1 **Title:** A Proteomic Atlas of Senescence-Associated Secretomes for Aging Biomarker  
2 Development

3

4 **Short Title:** A Proteomic Atlas of the Senescence-Associated Secretory Phenotype

5

6 **Authors:** Nathan Basisty<sup>1</sup>, Abhijit Kale<sup>1</sup>, Okhee H Jeon<sup>1</sup>, Chisaka Kuehnemann<sup>1</sup>,  
7 Therese Payne<sup>1</sup>, Chirag Rao<sup>1</sup>, Anja Holtz<sup>1</sup>, Samah Shah<sup>1</sup>, Vagisha Sharma<sup>3</sup>, Luigi  
8 Ferrucci<sup>4</sup>, Judith Campisi<sup>1, 2</sup>, Birgit Schilling<sup>\*\*1</sup>

9

10 <sup>1</sup> The Buck Institute for Research on Aging, Novato, California 94947, USA.

11 <sup>2</sup> Lawrence Berkeley Laboratory, University of California, Berkeley, California 94720,  
12 USA.

13 <sup>3</sup> University of Washington, Seattle, Washington 98195, USA.

14 <sup>4</sup> National Institute on Aging, Bethesda, Maryland 20892, USA.

15 **\*\* Correspondence:** [bschilling@buckinstitute.org](mailto:bschilling@buckinstitute.org)

16 **Abstract**

17 The senescence-associated secretory phenotype (SASP) has recently emerged as a  
18 driver of, and promising therapeutic target for, multiple age-related conditions, ranging  
19 from neurodegeneration to cancer. The complexity of the SASP, typically assessed by  
20 a few dozen secreted proteins, has been greatly underestimated, and a small set of  
21 factors cannot explain the diverse phenotypes it produces *in vivo*. Here, we present the  
22 ‘SASP Atlas’, a comprehensive proteomic database of soluble and exosome SASP  
23 factors originating from multiple senescence inducers and cell types. Each profile  
24 consists of hundreds of largely distinct proteins, but also includes a subset of proteins  
25 elevated in all SASPs. Our analyses identify several candidate biomarkers of cellular  
26 senescence that overlap with aging markers in human plasma, including GDF15, STC1  
27 and SERPINS, which significantly correlated with age in plasma from a human cohort,  
28 the Baltimore Longitudinal Study of Aging. Our findings will facilitate the identification of  
29 proteins characteristic of senescence-associated phenotypes and catalog potential  
30 senescence biomarkers to assess the burden, originating stimulus and tissue of origin  
31 of senescent cells *in vivo*.

32 **Abbreviations:** ATV, atazanavir treatment; BLSA, Baltimore Longitudinal Study of  
33 Aging; CTL, control; DDA, data-dependent acquisition; DAMP, damage-associated  
34 molecular pattern; DIA, data-independent acquisition; eSASP, extracellular vesicle  
35 senescence associated secretory phenotype; EVs, extracellular vesicles; IR, X-  
36 irradiation; MS, mass spectrometry; RAS, inducible RAS overexpression; SA- $\beta$ -Gal,  
37 senescence-associated  $\beta$ -galactosidase; SEN, senescent; sSASP, soluble senescence  
38 associated secretory phenotype.

## 39 **Introduction**

40 Cellular senescence is a complex stress response that causes an essentially  
41 irreversible arrest of cell proliferation and development of a multi-component  
42 senescence-associated secretory phenotype (SASP) [1–4]. The SASP consists of a  
43 myriad of cytokines, chemokines, growth factors and proteases that initiate  
44 inflammation, wound healing and growth responses in nearby cells [5,6]. In young  
45 healthy tissues, the SASP is typically transient and tends to contribute to the  
46 preservation or restoration of tissue homeostasis [5]. However, senescent cells  
47 increase with age and a chronic SASP is known or suspected to be a key driver of many  
48 pathological hallmarks of aging, including chronic inflammation, tumorigenesis and  
49 impaired stem cell renewal [5,7]. Powerful research tools have emerged to investigate  
50 the effect of senescence on aging and disease, including two transgenic p16<sup>lnk4a</sup> mouse  
51 models that allow the selective elimination of senescent cells [8,9] and compounds that  
52 mimic the effect of these transgenes. Data from several laboratories, including our own,  
53 strongly support the idea that senescent cells and the SASP drive multiple age-related  
54 phenotypes and pathologies, including atherosclerosis [10], osteoarthritis [11], cancer  
55 metastasis and cardiac dysfunction [12,13], myeloid skewing [14,15], kidney dysfunction  
56 [16], and overall decrements in healthspan [17]. Recently, senescent cells were shown  
57 to secrete bioactive factors into the blood that alter hemostasis and drive blood clotting  
58 [18]. SASP factors therefore hold potential as plasma biomarkers for aging and age-  
59 related diseases that are marked by the presence of senescent cells.

60 To develop robust and specific senescence and aging biomarkers, a  
61 comprehensive profile of the context-dependent and heterogeneous SASP is needed.



62 Several types of stress elicit a senescence and SASP response, which in turn can drive  
63 multiple phenotypes and pathologies associated with mammalian. These stressors  
64 have both shared and distinct secretory components and biological pathways. For  
65 example, telomere attrition resulting from repeated cell division (replicative  
66 senescence), ionizing radiation, chromatin disruption, and activation of certain  
67 oncogenes all can cause senescence-inducing genotoxic stresses, as can genotoxic  
68 therapeutic drugs, such as certain anti-cancer chemotherapies [13] and therapies for  
69 HIV treatment or prevention [19]. However, while both ionizing radiation and oncogenes  
70 lead to DNA double-strand breaks, ionizing radiation uniquely produces clustered  
71 oxidative DNA lesions [20] whereas oncogene activation drives DNA hyper-replication  
72 and double strand breaks [21]. Whether different senescence-inducers produce similar  
73 or distinct SASPs is at present poorly characterized. Thus, a comprehensive  
74 characterization of SASP components is critical to understanding how senescent  
75 responses can drive diverse pathological phenotypes *in vivo*.

76 The SASP was originally characterized by antibody arrays, which are necessarily  
77 biased, to measure the secretion of a small set of pro-inflammatory cytokines, proteases  
78 and protease inhibitors, and growth factors [1,2,4,22]. Subsequently, numerous  
79 unbiased gene expression studies performed on different tissues and donors of varying  
80 ages suggest that the SASP is more complex and heterogeneous [23], however, a  
81 recent meta-analysis of senescent cell transcriptomes confirmed the expression of a  
82 few dozen originally characterized SASP factors in multiple senescent cell types [24].

83 While unbiased transcriptome analyses are valuable, they do not directly assess  
84 the presence of *secreted* proteins. Thus, proteomic studies are needed to accurately

85 and quantitatively identify SASP factors as they are present in the secretomes of  
86 senescent cells. Recently, a mass spectrometric study reported several SASP factors  
87 induced by genotoxic stress [25], but an in-depth, quantitative and comparative  
88 assessment of SASPs originating from multiple stimuli and different cell types is lacking.  
89 Senescent cells also secrete bioactive exosomes [26,27] with both protein and miRNA  
90 [28] cargos. But, aside from pro-tumorigenic effects [28] and ability to induce paracrine  
91 senescence [26,29], the proteomic content and function of exosomes and small  
92 extracellular vesicles (EVs) secreted by senescent cells remains largely unexplored.

93 In this study, we demonstrate that the SASP is not a single phenotype, but rather  
94 is highly complex, dynamic and dependent on the senescence inducer and cell type.  
95 Here we also present the “SASP Atlas” ([www.SASPAAtlas.com](http://www.SASPAAtlas.com)), a comprehensive,  
96 curated and expanding online database of the soluble secretomes of senescent cells  
97 (sSASPs) induced by various stimuli in several cell types. We also present the first  
98 comprehensive proteomic analysis of the exosomal SASP (eSASP), which is largely  
99 distinct from the sSASP. Our approach leverages an innovative data-independent mass  
100 spectrometry workflow to discover new SASP biomarker candidates. The SASP Atlas  
101 can help identify candidate biomarkers of aging and diseases driven by senescent cells.  
102 We also show that the SASP is enriched for protein markers of human aging and  
103 propose a panel of top SASP-based aging and senescence biomarker candidates.

104

## 105 **Results**

### 106 **Cellular senescence entails extensive changes in the secreted proteome**

107 We established an efficient, streamlined proteomic workflow to discover novel SASP  
108 factors. We collected proteins secreted by senescent and quiescent/control primary  
109 human lung fibroblasts (IMR90) and renal cortical epithelial cells (**Fig 1**). Briefly, we  
110 induced senescence in the cultured cells by X-irradiation (IR), inducible oncogenic RAS  
111 overexpression (RAS), or treatment with the protease inhibitor atazanavir (ATV, used in  
112 HIV treatment) and allowed 1-2 weeks for the senescent phenotype to develop, as  
113 described [2]. In parallel, control cells were made quiescent by incubation in 0.2%  
114 serum for 3 days and were either mock-irradiated or vehicle-treated. Treated and  
115 control cells were subsequently cultured in serum-free medium for 24 hours and the  
116 conditioned media, containing soluble proteins and exosomes/extracellular vesicles  
117 (EVs), was collected. Soluble proteins and exosomes/EVs were separated by  
118 ultracentrifugation.

119 The label-free data-independent acquisition (DIA) approach enabled sensitive  
120 and accurate quantification of SASP proteins by integrating the MS2 fragment ion  
121 chromatograms [30,31]. We quantitatively compared proteins secreted by senescent  
122 cells with controls, and significantly changed proteins (q-value <0.05) that had a fold  
123 change of at least 1.5-fold (SEN/CTL) were identified. Proteins secreted at significantly  
124 higher levels by senescent relative to quiescent cells were defined as SASP factors. In  
125 fact, most proteins were secreted at much higher levels by senescent cells compared to  
126 non-senescent cells (**Fig 2**). Each treatment and control group contained 4-10  
127 biological replicates (see Methods for replicate details and experimental design).  
128 Relative protein quantification and statistical details are presented in **Table S1**.  
129 Induction of senescence was verified by senescence-associated  $\beta$ -galactosidase (SA- $\beta$ -

130 Gal) activity and p16INK4a and IL-6 mRNA levels (**Fig S1A-C**), as described [2]. There  
131 was no detectable cell death, as measured by a Sytox Green viability dye assay (**Fig**  
132 **S2**). X-irradiation and RAS overexpression induced senescence in >90% of cells and  
133 ATV induced senescence in about 65% of cells (**Fig S1A-B**).

134

135 **Fig 1. Proteomic workflow for isolation and analysis of secreted proteins and**  
136 **exosomes/EVs.** Senescence was induced in cultured primary human lung fibroblasts  
137 and renal epithelial cells by either X-irradiation (IR), inducible oncogenic RAS  
138 overexpression (RAS), or atazanavir (ATV). Control cells were made quiescent and  
139 either mock irradiated or vehicle treated. Soluble proteins and exosomes/EVs were  
140 then isolated from conditioned media. Samples were digested and subjected to mass  
141 spectrometric analysis (DIA), followed by protein identification and quantification using  
142 Spectronaut Pulsar [32] and by bioinformatic, pathway and network analyses in R and  
143 Cytoscape [33,34]. SEN = Senescent, CTL = Control.

144

145 This unbiased proteomic profiling identified up to ~1700 secreted proteins, a  
146 large fraction of which were up- or down-regulated following induction of senescence by  
147 IR, RAS or ATV (**Fig 2**). Between 340 to 714 proteins changed significantly in response  
148 to each inducer. As expected, most of the significantly changed proteins were markedly  
149 upregulated in senescent, compared to quiescent, cells, but, interestingly, a minority  
150 were downregulated (**Fig 2A**). Notably, the protein cargo of exosomes/EVs released by  
151 senescent cells was distinct compared to that from non-senescent cells (**Fig 2A**),  
152 indicating the existence of an exosome/EV SASP (eSASP) in addition to the sSASP.

153

154 **Fig 2. Core sSASP proteins, networks and pathways.** (A) Summary of proteins with  
155 significantly altered ( $q$ -value $<0.05$ ) secretion by senescent compared to quiescent cells  
156 following genotoxic, oncogenic, or ATV treatment stress in senescent human lung  
157 fibroblasts and renal epithelial cells. B) Venn diagram of proteins showing significantly  
158 increased secretion in senescent versus non-senescent cells following induction of  
159 senescence by IR, RAS or ATV. (C) ClueGO [33] pathway enrichment and network  
160 analyses of overlapping sSASPs resulting from each senescence inducer. Pathways of  
161 the same color have  $\geq 50\%$  similarity. Connecting lines represent Kappa connectivity  
162 scores  $>40\%$ . (D) Secretion levels of proteins in the neurodegeneration pathway,  
163 expressed as  $\log_2$  fold change of senescent versus control cells. (E) Unsupervised K-  
164 means clustering of proteins significantly increased in the sSASPs of all inducers based  
165 on the magnitude of the protein changes ( $\log_2$ -change) in senescent versus control  
166 groups and partitioned into three clusters. IR = X-irradiation, RAS = RAS oncogene  
167 overexpression, ATV = atazanavir treatment.

168

169 Most changes in the sSASP, independent of inducer, exhibited increased  
170 secretion by senescent cells, with only 1-6% of proteins secreted at lower levels. In  
171 contrast, one-half to two-thirds of all significant protein changes in exosomes/EVs from  
172 senescent fibroblasts were decreased relative to quiescent cells (**Fig 2A**). For renal  
173 epithelial cells, the sSASP comprised a more even mix of proteins with significantly  
174 lower or higher relative secretion. The magnitude of the fold-changes in the sSASP  
175 were generally higher in fibroblasts than in renal epithelial cells, regardless of inducer

176 **(Fig 2A)**. For example, 531 of significant protein changes in the fibroblast sSASP were  
177 >2-fold, compared to 138 in the renal epithelial cell sSASP. However, for renal  
178 epithelial cells an additional 212 proteins showed significant changes between 1.5- and  
179 2-fold increase or decrease.

180 For each cell type and fraction, we also measured the secretion of known SASP  
181 factors **(Fig S1D)**. These factors included chemokines (CXCLs), high mobility group  
182 box 1 protein (HMGB1), IGF binding proteins (IGFBPs), matrix metalloproteinases  
183 (MMPs), lamin B1 (LMNB1), and tissue inhibitors of metalloproteinase (TIMPs). In  
184 fibroblasts, all previously identified SASP factors were elevated, regardless of the  
185 senescence inducer. However, while expression of p16INK4a, IL-6 and SA- $\beta$ -Gal were  
186 also elevated in renal epithelial cells **(Fig S1A-C)**, most classical SASP proteins were  
187 either decreased or unchanged, except for IGFBP2. This finding suggests that  
188 fibroblast SASP markers do not necessarily pertain to other cell types. Similarly, within  
189 exosomes/EVs secreted by senescent fibroblasts, nearly all previously identified key  
190 SASP factors were either absent, unchanged or decreased, and none were consistently  
191 elevated in response to more than one inducer **(Fig S1D)**.

192

### 193 **Senescence-inducing stimuli drive largely distinct secretory phenotypes**

194 To determine how different senescence-inducing stimuli affect the SASPs, we  
195 compared the sSASP from human primary fibroblasts induced to senesce by IR, RAS or  
196 ATV. Strikingly, the sSASP was largely distinct among inducers, with an overlap of 150  
197 proteins among 1091 total increased proteins and no overlap among decreased

198 proteins (**Table S2**). Thus, most SASP protein components and corresponding  
199 changes were highly heterogenous and not shared among inducers (**Fig 2B**).

200 To determine whether there are core pathways associated with the SASPs, we  
201 performed pathway and network analyses on overlapping proteins in the sSASPs of  
202 each inducer (**Fig 2C**). The largest pathway associated with all inducers related to  
203 tissue and cell structure, including extracellular matrix, cytoskeleton, integrins and  
204 peptidase activity. Interestingly, neurodegeneration and three related pathways with  
205 high agreement (kappa score >40%) – apoptosis, ROS signaling and TP53-regulated  
206 metabolism - were also enriched among the overlapping sSASP proteins (**Fig 2C-D**).  
207 Among the neurodegeneration proteins were amyloid precursor protein (APP) and  
208 cystatin 3 (CST3), related to Alzheimer’s pathogenesis and risk [35,36], as well as  
209 Parkinsonism-associated deglycase (PARK7 or DJ1) [37] (**Fig 2D**). This enrichment of  
210 neurodegeneration-associated proteins and pathways suggests that senescent cells  
211 contribute to neurodegenerative diseases, for which these sSASP factors might serve  
212 as biomarkers, regardless of the senescence-inducing stimuli.

213 To distill the overlapping ‘core’ sSASP proteins into primary components, we  
214 performed an unsupervised machine learning analysis (**Fig 2E**). K-means clustering  
215 analysis uncovered three primary clusters among core sSASP components. Strikingly,  
216 one cluster, consisting of just three proteins – chemokine C-X-C motif ligand 1 (CXCL1),  
217 matrix metalloproteinase 1 (MMP1), and stanniocalcin 1 (STC1) – were highly  
218 represented in the sSASPs of all inducers, suggesting these proteins might serve as  
219 surrogate markers of the sSASP. Of note, STC1, among the top sSASP proteins, is a

220 previously unidentified SASP factor and a secreted hormone with many disease  
221 associations [38–43]. Our analyses also validate MMP1 and CXCL1 as SASP markers.

222

### 223 **sSASP is largely distinct in composition and regulation in fibroblasts and** 224 **epithelial cells**

225 We compared the secretomes of lung fibroblasts and renal epithelial cells to  
226 determine the cell-type specificity of the sSASP. The sSASP of these cells were largely  
227 distinct (**Fig 3A-B**). Among the proteins increased in the sSASP of each cell type, 9-  
228 23% overlapped, and the magnitude of the changes by renal epithelial cells were, in  
229 most cases, lower than in fibroblasts regardless of the senescence inducer, although it  
230 is possible that senescent fibroblasts secrete more protein overall than epithelial cells in  
231 response to stress. Interestingly, 20-30% of proteins significantly decreased in the  
232 sSASP of renal epithelial cells overlapped with proteins significantly increased in the  
233 fibroblast sSASP (**Fig 4B**). Among the epithelial factors that changed oppositely to the  
234 fibroblast factors were IGFBNs, TIMPs 1 and 2, CXCL1 and most SERPINs (**Fig 2C**). In  
235 all, 17 sSASP factors were shared between all senescence inducers and cell types we  
236 examined (**Table S3**).

237

238 **Fig 3. Epithelial cells and fibroblasts have distinct sSASPs.** (A) Venn diagram  
239 comparing proteins significantly increased in the sSASPs of senescent fibroblasts and  
240 epithelial cells, both induced by X-irradiation ( $q < 0.05$ ). (B) Venn diagram comparing  
241 protein increases in the fibroblast sSASP vs *decreases* in the epithelial sSASP. (C)  
242 Pathway and network analysis of secreted proteins significantly increased by senescent



243 fibroblasts and epithelial cells. (D) Pathway and network analysis of proteins  
244 significantly increased in the fibroblast sSASP but significantly decreased in the  
245 epithelial cell sSASP.

246

247 Pathway and network analysis of proteins increased in the sSASPs of fibroblasts  
248 and epithelial cells (**Fig 3C**) showed that most pathways belonged to one of three  
249 general categories: protein turnover and secretion, primary metabolism, and cellular  
250 detoxification. While not as apparent on a molecule-by-molecule basis, many pathways  
251 were commonly enriched in both the epithelial and fibroblast sSASPs (**Fig 3C** and **Fig**  
252 **2C**), including vesicle-mediated transport and exosomes, glycolytic metabolism, and  
253 cellular detoxification. Of notable exceptions, pathways enriched uniquely by epithelial  
254 cells included protein translation and degradation (lysosome and phagosome).

255 Surprisingly, most renal epithelial sSASP proteins with significantly *lower*  
256 secretion by senescent cells were enriched in pathways related to tissue and cell  
257 structure, adhesion and motility (**Fig 3D**). This finding contrasts with previous reports  
258 and our own analyses of fibroblasts (**Fig 2C**), in which these pathways were increased,  
259 regardless of inducer. The irradiated epithelial sSASP also had significantly lower  
260 levels of proteins involved in RNA processing, in contrast to increased RNA metabolism  
261 in the irradiated fibroblast sSASP. Additionally, the epithelial sSASP was significantly  
262 depleted in proteins related to proteasome degradation, antigen processing and the  
263 complement system.

264 Damage-associated molecular patterns (DAMPs, also known as alarmins or  
265 danger signals) are released from cells in response to internal and external stress, and

266 are components of the SASP [44]. HMGB1 is a founding member of the DAMPs, a  
267 prominent SASP marker, and, along with calreticulin (CALR), an important driver of  
268 inflammation [44]. Our analysis identified increased secretion of multiple DAMPs,  
269 including HMGB1 and CALR, by senescent fibroblasts under all senescence inducers  
270 (**Table 1**). However, the secretion of DAMPs was unchanged or significantly reduced  
271 by senescent epithelial cells, demonstrating that some defining SASP components vary  
272 depending on cell type.

273

274 **Table 1: DAMPs are a core component of the fibroblast sSASP**

275

|                 | <b>Log2(SEN/CTL)</b>           |                   |                   |                               |
|-----------------|--------------------------------|-------------------|-------------------|-------------------------------|
|                 | <b><u>IR (Fibroblasts)</u></b> | <b><u>RAS</u></b> | <b><u>ATV</u></b> | <b><u>IR (Epithelial)</u></b> |
| <b>HMGB1</b>    | 2.47                           | 0.59              | 2.46              | NS                            |
| <b>CALR</b>     | 1.22                           | 0.51              | 1.32              | -1.00                         |
| <b>CD44</b>     | 2.25                           | 1.20              | 1.92              | -0.69                         |
| <b>S100A11</b>  | 0.56                           | 1.35              | 1.88              | NS                            |
| <b>LGALS3BP</b> | 1.46                           | 1.76              | 1.79              | -1.19                         |
| <b>VCAN</b>     | 1.80                           | 1.32              | 0.98              | -1.42                         |
| <b>TNC</b>      | 1.64                           | 1.40              | 2.46              | 0.29                          |
| <b>HSPA5</b>    | 2.03                           | 3.93              | 1.78              | -0.34                         |
| <b>HSP90AB1</b> | 5.01                           | 2.69              | 1.65              | NS                            |
| <b>HSPA8</b>    | 2.49                           | 2.98              | 1.46              | 0.32                          |
| <b>HSPA1A</b>   | 2.96                           | 2.4               | 1.45              | 0.54                          |

|                 |      |      |      |       |
|-----------------|------|------|------|-------|
| <b>HSP90AA1</b> | 4.94 | 3.42 | 1.34 | NS    |
| <b>HSP90B1</b>  | 2.67 | 1.61 | 0.66 | -0.27 |

276 All changes are significant ( $q < 0.05$ ) unless denoted NS (Not Significant). SEN =  
277 Senescent, CTL = Quiescent Control, IR = X-irradiation, RAS = oncogenic RAS  
278 overexpression, ATV = Atazanavir treatment.

279

### 280 **Exosome/EV proteomic signatures are altered by cellular senescence.**

281 Because proteins are also secreted as extracellular vesicle cargo, we  
282 hypothesized that senescent cells would show significant changes in this fraction, which  
283 we term the exosome/EV SASP (eSASP). We used ultracentrifugation to enrich  
284 conditioned media for exosomes and small EVs released by quiescent and senescent  
285 fibroblasts induced by X-irradiation and oncogenic RAS overexpression (**Fig 1**). We  
286 confirmed the quality of exosome/EV purified fractions by measuring presence of  
287 multiple EV-specific markers, including CD63 and CD9 [45], and by particle counting  
288 and size distribution analysis (**Fig S4**). Exosomes/EVs from senescent fibroblasts  
289 showed a strikingly altered protein composition compared with exosomes from non-  
290 senescent cells (**Fig 2A**).

291 To determine whether the characteristics of exosomes/EVs from senescent cells  
292 are altered, we analyzed particle number and size distribution of exosomes/EVs  
293 secreted into the culture medium of senescent and non-senescent cells over a 24-hour  
294 period. On average, senescent cells released a greater number of vesicles -- about 68  
295 per cell compared to 49 per control cell (**Fig S4B**). However, the mean diameter, size  
296 distribution of senescent and control exosomes/EVs were similar (**Fig S4B-C**). Further

297 work using senolytics may validate whether the number, size, and other characteristics  
298 of secreted exosome/EVs are indicators of senescent cell burdens in humans.

299 The protein content of exosomes/EVs released by IR- vs RAS-induced  
300 senescent fibroblasts was largely distinct, sharing only 9 significantly altered proteins  
301 (**Fig 4A**). Exosomes/EVs were reported to contain protein signatures of their originating  
302 cells [28,46], offering a unique opportunity to identify senescence biomarkers with a  
303 degree of cell type specificity. Thus, exosome/EV proteins might distinguish senescent  
304 cells of different origins or resulting from different stressors. The membranes of  
305 exosomes are also representative of the originating cells [28,46]. Indeed, about 30% of  
306 all the exosome/EV proteins that increased upon senescence are plasma membrane  
307 proteins (**Fig 4B**), suggesting that exosomes/EVs might also identify cell type origins  
308 through their cell-surface proteins. In addition to enrichment of proteins involved in  
309 membrane organization, such as cell adhesion and cell junction assembly proteins, the  
310 eSASP is uniquely enriched with signaling pathways not found in the sSASP, such as  
311 RAS signaling, G-protein signaling, and prostaglandin synthesis and regulation (**Fig**  
312 **4C**). Full lists of proteins secreted by senescent exosomes are in **Table S1**.

313

314 **Fig 4. Cellular senescence alters exosome/EV features and composition.** (A)  
315 Table showing overlapping significant protein changes in exosomes/EVs secreted by  
316 senescent cells induced by IR vs RAS ( $q < 0.05$ ). (B) Enrichment analysis of gene-  
317 ontology/cellular compartments overrepresented among protein contents of  
318 exosomes/EVs released by senescent cells. (C) Network analysis of pathways and  
319 functions unique to the eSASP.

320

## 321 **The SASP contains potential aging and disease biomarkers**

322 As a driver of many aging and disease phenotypes, the SASP could include  
323 known biomarkers of aging and age-related diseases. A recent biomarker study  
324 identified 217 proteins that are significantly associated with age in human plasma  
325 (adjusted  $p < 0.00005$ ) [47]. Of these, 20 proteins (9.2%) were present in the originally-  
326 defined SASP [2]. Strikingly, multiple newly identified SASP factors from our present  
327 study were also identified in the study of human plasma [47] (**Fig 5**). Of all the  
328 originally-defined SASP factors and unique SASP proteins that we identify here, 101  
329 proteins were also identified as markers of aging in human plasma (46.5% of all plasma  
330 aging markers) (**Fig 5A, C-D, Table S4**). Considering the originally defined SASP in  
331 addition our newly identified “core SASP” (SASP components resulting from all  
332 senescence inducers), the number of age-associated plasma proteins that are also  
333 SASP proteins is 40, or 18.4% of plasma aging markers (**Fig 5B-D, Table S4**). Thus,  
334 plasma biomarkers of aging are highly enriched with SASP factors.

335

336 **Fig 5. Human plasma aging markers are enriched for SASP proteins.** (A) Venn  
337 diagram comparing SASP factors secreted by at least one of IR-, RAS-, or ATV-  
338 induced senescent cells with markers of aging identified in human plasma [47]. (B)  
339 Overlap between the core SASP (proteins secreted following all senescence-inducing  
340 stimuli) and plasma aging markers. (C) Pie chart showing the proportion of known  
341 SASP factors, newly identified core SASP factors, and SASP factors found among  
342 plasma markers of aging in humans. (D) Number of proteins contained in the originally

343 identified SASP, core SASP, non-core SASP, and markers of aging in human plasma  
344 [47] ( $p < 0.00005$ ). Top core SASP factors GDF15, STC1, SERPINs, and MMP1 are  
345 among the plasma aging markers.

346  
347 Complement and coagulation cascade proteins [18], particularly protease  
348 inhibitors such as SERPINs, were also noted as prominent plasma biomarkers of aging  
349 [47]. These proteins and their pathway networks were robustly altered in the SASPs of  
350 cells induced to senesce by all the tested stressors (**Fig 2C, Fig 6A**). The protein  
351 having the strongest association with aging [47], GDF15 ( $r=0.82$ ), was among the most  
352 highly secreted proteins in the sSASP induced by IR, RAS and ATV in fibroblasts, and  
353 in epithelial cells induced by IR (**Fig 6D**). Increased secretion of top core SASP  
354 biomarkers SERPINE1, MMP1, STC1, and GDF15 was confirmed by western blotting in  
355 RAS-induced senescent cells compared to controls (**Fig S3**). The enrichment of aging  
356 and disease biomarkers in the secretomes of senescent cells supports their link to a  
357 wide spectrum of age-related diseases.

358  
359 **Fig 6. The SASP contains aging and disease biomarkers.** (A) Serpins are secreted  
360 at high levels by senescent fibroblasts induced by IR, RAS or ATV. (B) MMP1 and (C)  
361 STC1 are among the most highly secreted proteins by senescent fibroblasts. (D) The  
362 plasma aging biomarker GDF15 is increased in the sSASPs of fibroblasts induced to  
363 senesce by IR, RAS and ATV and epithelial cells induced to by IR. IR = X-irradiation,  
364 RAS = RAS oncogene overexpression, ATV = atazanavir treatment, Epi = renal  
365 epithelial cells. \* $q < 0.05$ , \*\* $q < 0.01$ , \*\*\* $q < 0.001$ .

366

## 367 **Discussion**

368         Here we present SASP Atlas ([www.SASPAAtlas.com](http://www.SASPAAtlas.com)), the first proteome-based  
369 database of SASPs. This database contains the contents of exosome/EV and soluble  
370 secretomes, in addition to SASPs originating from multiple senescence-inducing  
371 stresses and two distinct cell types. The SASP Atlas will be continuously updated with  
372 SASP profiles from new cell types and senescence, including paracrine (or bystander)  
373 senescence [48,49], as well as temporal dynamics of the SASP – all generated by our  
374 laboratories.

375         Our proteomic analysis leverages a modern data-independent acquisition (DIA or  
376 SWATH) mass spectrometry workflow, which comprehensively acquires label-free,  
377 quantitative peptide (MS1) and fragment-level (MS2) data for all peptides in each  
378 sample [30–32,50,51]. DIA workflows are not limited by the stochastic peptide MS/MS  
379 sampling biases characteristic of traditional data-dependent acquisition (DDA) mass  
380 spectrometry. In addition to the SASP Atlas database, we provide panels of SASP  
381 factors on Panorama Web, a freely-available web repository for targeted mass  
382 spectrometry assays [52,53]. These resources can be used as a reference and guide to  
383 identify and quantify SASP factors that may be associated with specific diseases, and to  
384 develop aging and disease-related biomarkers (**Fig 7**).

385

### 386 **Fig 7. SASP Atlas: A Comprehensive Resource for Senescence-Associated**

387 **Secretory Phenotypes.** SASP Atlas ([www.SASPAAtlas.com](http://www.SASPAAtlas.com)) is a curated and freely-

388 available database of the secretomes of senescent cells, including both the soluble and

389 exosome SASP, that can be used to identify SASP components or biomarker  
390 candidates for senescence burden, aging and related diseases.

391

392 SASP profiles are needed to develop senescence biomarkers in human plasma  
393 or other biofluids, and for identifying individuals to treat with, and measuring the efficacy  
394 of, senescence-targeted therapies such as senolytics. Translating senescence- and  
395 SASP-targeted interventions to humans will require a comprehensive profile of SASPs,  
396 both to identify their deleterious components and to develop human biomarkers to  
397 assess senescent cell burden. The SASP, as originally identified, comprised ~50  
398 cytokines, chemokines, growth factors, and proteases that were detected by biased  
399 methods (e.g., antibody arrays) and/or transcriptional analyses [1–4,24]. While these  
400 comprehensive analyses are valuable in describing the overall phenotype of senescent  
401 cells, proteomic analyses are complimentary in both confirming transcriptional changes  
402 and identifying and quantifying novel SASP factors that are not apparent at the mRNA  
403 level. For example, a recent meta-analysis of senescent cell transcriptomes [24]  
404 identified >1,000 genes with increased expression specifically in senescent cells  
405 induced by IR or oncogenic RAS, and >700 ‘core’ senescence genes (increased  
406 expression following all senescence inducers tested). Our analysis identified 548, 644,  
407 and 143 proteins in the IR, RAS and ‘core’ SASP, respectively, that were previously  
408 unreported at the RNA level (**Fig S5**). We expect that the number and nature of these  
409 SASP core proteins will change as we and others interrogate additional cell types and  
410 senescence inducers, and we will continue to curate the interactive SASP Atlas.



411 Additionally, the secretion of SASP factors, such as HMGB1 and other DAMPs, is not  
412 generally transcriptionally driven.

413 DAMP receptor-bearing cells, including cells of the innate immune system,  
414 recognize extracellular DAMPs as signals to promote inflammatory and fibrotic  
415 responses. Increased circulating DAMPs are hypothesized to play a role in aging  
416 [54,55], particularly the age-related inflammation termed ‘inflammaging’ [56]. DAMPs  
417 can also serve as biomarkers of a number of diseases, including trauma and  
418 cardiovascular, metabolic, neurodegenerative, malignant and infectious diseases  
419 [54,57,58]. In addition, our top “core sSASP” biomarker candidates, have been  
420 identified as disease biomarkers in human studies. For example, human cohort studies  
421 have recently reported GDF15 as a biomarker of cardiovascular disease, cardiovascular  
422 and cancer mortality and morbidity, renal disease, and all-cause mortality independent  
423 of cardiovascular mortality [59–65]. Additionally, two of the top “core sSASP” proteins  
424 identified by an unbiased k-means clustering algorithm – STC1 and MMP1 (**Fig 5C-D**) –  
425 were reported as significant aging biomarkers [47]. In addition to aging, MMP1 has  
426 been identified as a biomarker for several cancers, pulmonary fibrosis and potentially  
427 Alzheimer’s disease [66–69], whereas STC1 has been identified as a diagnostic and  
428 prognostic biomarker for cancers, pulmonary fibrosis, renal ischemia/reperfusion injury  
429 and Alzheimer’s disease [38–43].

430 Our quantitative unbiased *proteomic* analysis of senescent fibroblasts and  
431 epithelial cells reveals a much larger and diverse SASP than initially reported. These  
432 SASP profiles contribute a number of new potential senescence, aging and disease  
433 biomarkers. In addition to general senescence biomarkers, many proteins will likely be

434 specific to cell-type and originating stimulus. Thus, biomarkers present in human  
435 patients *in vivo* will likely vary depending on the affected tissue, originating cell types,  
436 and senescence stimuli. Therefore, comprehensive quantitative profiles of the SASP  
437 under a variety of physiological conditions will provide biomarker candidates with a  
438 higher degree of selectivity to specific pathologies in humans.

439

## 440 **Materials and Methods**

### 441 **Reagents and Resources**

442 A full list of reagents and resources, including vendors and catalog numbers, are  
443 available in a Reagent and Resource Table (**Table S5**). Further information and  
444 requests for resources and reagents should be directed to the Lead Contact, Birgit  
445 Schilling ([bschilling@buckinstitute.org](mailto:bschilling@buckinstitute.org)).

446

### 447 **Human Cell Culture and Primary Cell Lines**

448 IMR-90 primary human lung fibroblasts (ATCC #CCL-186) were cultured in Dulbecco's  
449 Modified Eagle's Medium (DMEM, Gibco #12430-054) supplemented with penicillin and  
450 streptomycin (5000 U/mL and 5000 µg/mL, Gibco #15070063) and 10% Fetal Bovine  
451 Serum (FBS, Gibco #2614079). Primary human renal epithelial cells (ATCC  
452 PCS400011) were cultured in Renal Epithelial Cell Basal Medium (Female, ATCC  
453 #PCS-400-030). Both cell types were maintained at 37° C, 10% CO<sub>2</sub> and 3% O<sub>2</sub>.

454

### 455 **Induction of Senescence**

456 X-irradiation: Senescence was induced by ionizing radiation (IR;10 Gy X-ray).  
457 Quiescent control cells were mock irradiated. Senescent cells were cultured for 10 days  
458 to allow development of the senescent phenotype, and quiescent cells were cultured in  
459 0.2% serum for 3 days. Cells were then washed with PBS (Gibco #10010-023) and  
460 placed in serum- and phenol red-free DMEM (Gibco #21063-029) and conditioned  
461 media was collected after 24 hours.

462 RAS overexpression: RAS<sup>v12</sup> was cloned in pLVX vector (Lenti-X™ Tet-On from  
463 Clontech #632162) to make inducible lentiviruses, which were used to infect early  
464 passage IMR-90 cells (PD-30). Transduced cells were selected in puromycin (1 µg/ml)  
465 for 24 hours. For induction of RAS<sup>v12</sup>, cells were treated with 1 µg/ml doxycycline in  
466 DMSO (Sigma # D9891) for 4 (early time point) or 7 days. Doxycycline was replaced  
467 after every 48 hours. Subsequently, cells were washed with PBS and placed in serum-  
468 and phenol red-free DMEM and conditioned media was collected after 24 hours.

469 Atazanivir treatment: Cells were cultured in appropriate media containing 20 µM  
470 Atazanavir, which is a clinically relevant dose, or vehicle (DMSO) for 9 (early timepoint)  
471 or 14 days. Subsequently, cells were washed with PBS and placed in serum- and  
472 phenol red-free DMEM and conditioned media was collected after 24 hours.

473

#### 474 **Isolation of Secreted Soluble Proteins and Exosomes/EVs:**

475 Proteins secreted into serum-free medium over a 24-hr period were collected. An  
476 ultracentrifugation protocol was used to separate the exosome and small extracellular  
477 vesicle fraction from the soluble protein fraction [70]. Briefly, conditioned medium was  
478 centrifuged at 10,000 x g at 4° C for 30 minutes to remove debris. The supernatant was

479 then centrifuged at 20,000 x g at 4° C for 70 minutes to remove microvesicles followed  
480 by ultracentrifugation at 100,000 x g at 4° C for 70 minutes to pellet exosomes. The  
481 exosome-depleted supernatant was saved as the sSASP. The exosome pellet was  
482 then washed twice with PBS and ultracentrifuged again at 100,000 x g at 4° C for 70  
483 minutes before resuspending in PBS and saved as the eSASP.

484

### 485 **Proteomic Sample Preparation**

486 Chemicals: Acetonitrile (#AH015) and water (#AH365) were from Burdick & Jackson.  
487 Iodoacetamide (IAA, #I1149), dithiothreitol (DTT, #D9779), formic acid (FA, #94318-  
488 50ML-F), and triethylammonium bicarbonate buffer 1.0 M, pH 8.5 (#T7408) were from  
489 Sigma Aldrich, urea (#29700) was from Thermo Scientific, sequencing grade trypsin  
490 (#V5113) was from Promega and HLB Oasis SPE cartridges (#186003908) were from  
491 Waters.

492 Protein concentration and quantification: Samples were concentrated using Amicon  
493 Ultra-15 Centrifugal Filter Units with a 3 kDa cutoff (MilliporeSigma #UFC900324) as  
494 per the manufacturer instructions and transferred into 8M urea/50 mM  
495 triethylammonium bicarbonate buffer at pH 8. Protein quantitation was performed using  
496 a BCA Protein Assay Kit (Pierce #23225).

497 Digestion: Aliquots of each sample containing 25-100 µg protein were brought to equal  
498 volumes with 50 mM triethylammonium bicarbonate buffer at pH 8. The mixtures were  
499 reduced with 20 mM DTT (37°C for 1 hour), then alkylated with 40 mM iodoacetamide  
500 (30 minutes at RT in the dark). Samples were diluted 10-fold with 50 mM

501 triethylammonium bicarbonate buffer at pH 8 and incubated overnight at 37°C with  
502 sequencing grade trypsin (Promega) at a 1:50 enzyme:substrate ratio (wt/wt).  
503 Desalting: Peptide supernatants were collected and desalted with Oasis HLB 30 mg  
504 Sorbent Cartridges (Waters #186003908, Milford, MA), concentrated, and re-suspended  
505 in a solution containing mass spectrometric ‘Hyper Reaction Monitoring’ retention time  
506 peptide standards (HRM, Biognosys #Kit-3003) and 0.2% formic acid in water.

507

### 508 **Mass Spectrometry Analysis**

509 Samples were analyzed by reverse-phase HPLC-ESI-MS/MS using the Eksigent Ultra  
510 Plus nano-LC 2D HPLC system (Dublin, CA) combined with a cHiPLC system directly  
511 connected to an orthogonal quadrupole time-of-flight SCIEX TripleTOF 6600 or a  
512 TripleTOF 5600 mass spectrometer (SCIEX, Redwood City, CA). Typically, mass  
513 resolution in precursor scans was ~ 45,000 (TripleTOF 6600), while fragment ion  
514 resolution was ~15,000 in ‘high sensitivity’ product ion scan mode. After injection,  
515 peptide mixtures were transferred onto a C18 pre-column chip (200 µm x 6 mm  
516 ChromXP C18-CL chip, 3 µm, 300 Å, SCIEX) and washed at 2 µl/min for 10 min with  
517 the loading solvent (H<sub>2</sub>O/0.1% formic acid) for desalting. Peptides were transferred to  
518 the 75 µm x 15 cm ChromXP C18-CL chip, 3 µm, 300 Å, (SCIEX), and eluted at 300  
519 nL/min with a 3 h gradient using aqueous and acetonitrile solvent buffers.

520 All samples were analyzed by data-independent acquisitions (DIA), specifically using  
521 variable window DIA acquisitions [71]. In these DIA acquisitions, windows of variable  
522 width (5 to 90 m/z) are passed in incremental steps over the full mass range (m/z 400-  
523 1250). The cycle time of 3.2 sec includes a 250 msec precursor ion scan followed by

524 45 msec accumulation time for each of the 64 DIA segments. The variable windows  
525 were determined according to the complexity of the typical MS1 ion current observed  
526 within a certain m/z range using a SCIEX ‘variable window calculator’ algorithm (more  
527 narrow windows were chosen in ‘busy’ m/z ranges, wide windows in m/z ranges with  
528 few eluting precursor ions) [31]. DIA tandem mass spectra produce complex MS/MS  
529 spectra, which are a composite of all the analytes within each selected Q1 m/z window.  
530 All collected data was processed in Spectronaut using a pan-human library that  
531 provides quantitative DIA assays for ~10,000 human proteins [72].

532

### 533 **Cell Viability Assays**

534 Cell viability was assessed with SYTOX Green Nucleic Acid Stain (Invitrogen #S7020).  
535 Senescent and control cells were incubated for 24 hours in serum-free medium  
536 containing SYTOX Green with continuous imaging. Cell death was quantified by  
537 counting total SYTOX Green positive nuclei during the 24-hour time-lapse video.

538

### 539 **Senescence-Associated $\beta$ -Galactosidase Staining**

540 Senescence-associated beta-galactosidase (SA- $\beta$ -gal) activity was determined using  
541 the BioVision Senescence Detection Kit (Cat# K320-250). For each experiment,  
542 approximately 100–150 cells were counted.

543

### 544 **RNA Extraction and Quantitative Real-Time PCR**

545 Total RNA was prepared using the PureLink Micro-to-Midi total RNA Purification System  
546 (Invitrogen # 12183018A), according to the manufacturer’s protocol. Samples were first

547 treated with DNase I Amp Grade (Invitrogen #18068015) to eliminate genomic DNA  
548 contamination. RNA was reverse transcribed into cDNA using a High-Capacity cDNA  
549 Reverse Transcription Kit (Applied Biosystems #4368813), according to the  
550 manufacturer's protocol. Quantitative RT-PCR (qRT-PCR) reactions were performed as  
551 described using the Universal Probe Library system (Roche). Actin and tubulin  
552 predeveloped TaqMan assays (Applied Biosystems) were used to control for cDNA  
553 quantity. qRT-PCR assays were performed on the LightCycler 480 System (Roche).  
554 The primers and probes were as follows:

555 Human actin F 5'- CCAACCGCGAGAAGATGA; R 5'- TCCATCACGATGCCAGTG,  
556 UPL probe #64

557 Human tubulin F 5'- CTTCGTCTCCGCCATCAG; R 5'- TTGCCAATCTGGACACCA,  
558 UPL Probe #58

559 Human IL-6 F 5'- GCCCAGCTATGAACTCCTTCT; R 5'- GAAGGCAGCAGGCAACAC,  
560 UPL Probe #45

561 Human p16<sup>INK4a</sup> F 5'-GAGCAGCATGGAGCCTTC; R 5'-CGTAACTATTCGGTGCGTTG,  
562 UPL Probe #34

563

## 564 **Exosome Characterization and Size Distribution Analysis**

565 Protein determination is performed on exosomes/EVs isolated by ultracentrifugation by  
566 direct absorbance and 20 µg of protein is used for input for the MacsPlex Exosome Kit  
567 (Miltenyi) assay. These exosomes are enriched for CD63, CD9, and CD81 surface  
568 proteins using antibody beads. This pool of exosomes is then probed for 34 other  
569 surface markers used for analysis and comparison across samples. Particle diameter

570 and concentration were assessed by tunable resistive pulse sensing (TRPS) on an  
571 IZON qNano Nanoparticle Characterization instrument using a NP150 nanopore  
572 membrane at a 47 calibration with 110 nm carboxylated polystyrene beads at a  
573 concentration of  $1.2 \times 10^{13}$  particles/mL (Zen-bio, Inc.).

574

### 575 **Processing, Quantification, and Statistical Analysis of MS Data**

576 DIA acquisitions were quantitatively processed using the proprietary Spectronaut v12  
577 (12.020491.3.1543) software [32] from Biognosys. A pan-human spectral library was  
578 used for Spectronaut processing of the DIA data [72]. Quantitative DIA MS2 data  
579 analysis was based on extracted ion chromatograms (XICs) of 6-10 of the most  
580 abundant fragment ions in the identified spectra. Relative quantification was performed  
581 comparing different conditions (senescent versus control) to assess fold changes. The  
582 number of replicates for each experiment are as follows: X-irradiated fibroblasts, 4  
583 senescent and 4 control replicates; X-irradiated epithelial cells, 5 senescent and 5  
584 control replicates; 4 day RAS-induction fibroblasts, 10 senescent and 10 control  
585 replicates; 7 day RAS-induced fibroblasts, 6 senescent and 6 control replicates;  
586 atazanavir-treated fibroblasts, 3 senescent (9 days treatment), 3 senescent (14 days  
587 treatment), and 4 control replicates; X-irradiated fibroblast exosomes, 5 senescent and  
588 5 control replicates; 7 day RAS-induced fibroblast exosomes, 6 senescent and 6 control  
589 replicates. Significance was assessed using FDR corrected q-values < 0.05.

590

### 591 **Pathway and Network Analysis**



592 Gene ontology, pathway, and network analysis was performed using the GlueGO  
593 package, version 2.5.3, in Cytoscape, version 3.7.1 [33,34]. Curated pathways for  
594 enrichment analysis were referenced from the following databases: GO Biological  
595 Function, GO Cellular Compartment, Kegg pathways, WikiPathways, and Reactome  
596 Pathways. For gene ontology data, testing was restricted to pathways with  
597 experimental evidence (EXP, IDA, IPI, IMP, IGI, IEP). The statistical cutoff for enriched  
598 pathways was Bonferroni-adjusted p-values  $< 0.01$  by right-sided hypergeometric  
599 testing. Pathway-connecting edges were drawn for kappa scores  $> 40\%$ . Kappa scores  
600 are a measure of inter-pathway agreement among observed proteins that indicate  
601 whether pathway agreement is greater than expected by chance based on shared  
602 proteins. Pathways with the same color indicate  $\geq 50\%$  similarity in terms.

603

#### 604 **K-Means Clustering**

605 Unsupervised clustering was performed in Python with Scikit-learn, a module integrating  
606 a wide range of machine learning algorithms [73]. Datasets were pre-processed with  
607 the StandardScaler function and clustered with the KMeans algorithm.

608

#### 609 **Data Visualization**

610 Heatmaps were visualized in R using the heatmap.2 function in the 'gplots' package  
611 [74]. Venn diagrams were constructed using the "VennDiagram" package [75]. Color  
612 palettes in R were generated with the "RColorBrewer" package [76]. Pathway and  
613 network visualizations were generated and modified using the GlueGO package in  
614 Cytoscape [33,34].

615  
616 **Data availability:** All raw files are uploaded to the Center for Computational Mass  
617 Spectrometry, MassIVE and the ProteomeXchange Consortium and can be downloaded  
618 using the following link <ftp://massive.ucsd.edu/MSV000083750> (MassIVE ID number:  
619 MSV000083750, ProteomeXchange ID number: PXD013721). Data uploads include  
620 the protein identification and quantification details, spectral library and FASTA file used  
621 for mass spectrometric analysis. SASP proteomic profiles are available on Panorama  
622 ([https://panoramaweb.org/project/Schilling/SASP\\_Atlas\\_Buck/begin.view?](https://panoramaweb.org/project/Schilling/SASP_Atlas_Buck/begin.view?)), a repository  
623 for targeted mass spectrometry assays generated in Skyline software [52,53]. All data  
624 are available for viewing and downloading on SASP Atlas ([www.saspatlas.com](http://www.saspatlas.com)).

625  
626 **MassIVE:** MSV000083750 (<ftp://massive.ucsd.edu/MSV000083750>)

627 **ProteomeXchange:** PXD013721  
628 (<http://proteomecentral.proteomexchange.org/cgi/GetDataset?ID=PXD013721>)

629 **SASP Atlas:** [www.SASPatlas.com](http://www.SASPatlas.com)

630 **SASP Panels:**  
631 [https://panoramaweb.org/project/Schilling/SASP\\_Atlas\\_Buck/begin.view?](https://panoramaweb.org/project/Schilling/SASP_Atlas_Buck/begin.view?)

632  
633 **Acknowledgments:** We thank John C.W. Carroll for graphical support generating  
634 figures.

635  
636 **Funding:** This work was supported by grants from the National Institute on Aging (U01  
637 AG060906-01, PI: Schilling; P01AG017242 and R01AG051729, PI: Campisi) and a

638 National Institutes of Health Shared Instrumentation Grant (1S10 OD016281, Buck  
639 Institute). N.B. and O.J. were supported by postdoctoral fellowships from the Glenn  
640 Foundation for Medical Research. A.K. was supported by the SENS Foundation. V.S.  
641 was supported by the University of Washington, Seattle Proteomics Resource  
642 (UWPR95794).

643

644 **Competing interests:** J.C. is a founder and share holder of Unity Biotechnology, which  
645 develops senolytic drugs. The other authors have declared no competing interests.

646

647 **Author Contributions:** Conceptualization, N.B., B.S., J.C. L.F.; Cell Culture, N.B., A.K.,  
648 O.J., C.K., T.P.; RNA expression and Activity Assays, N.B., A.K., O.J., C.K. T.P.;  
649 Proteomic Sample Preparation, N.B., T.P., A.H., S.S.; Data Analysis, N.B., B.S., A.H.,  
650 S.S.; Pathway and Network Analysis, N.B., C.R.; Visualization, N.B., C.R.; Web  
651 Database, V.S., C.R., N.B, B.S.; Writing and Editing, N.B., B.S., J.C., L.F.; Funding  
652 Acquisition, B.S., J.C.

653

654

655 **References**

- 656 1. Acosta JC, O’Loghlen A, Banito A, Guijarro MV, Augert A, Raguz S, et al.  
657 Chemokine signaling via the CXCR2 receptor reinforces senescence. *Cell*.  
658 2008;133: 1006–1018. doi:10.1016/j.cell.2008.03.038
- 659 2. Coppé J-P, Patil CK, Rodier F, Sun Y, Muñoz DP, Goldstein J, et al. Senescence-  
660 Associated Secretory Phenotypes Reveal Cell-Nonautonomous Functions of  
661 Oncogenic RAS and the p53 Tumor Suppressor. *PLOS Biology*. 2008;6: e301.  
662 doi:10.1371/journal.pbio.0060301
- 663 3. Coppé J-P, Patil CK, Rodier F, Krtolica A, Beauséjour CM, Parrinello S, et al. A  
664 Human-Like Senescence-Associated Secretory Phenotype Is Conserved in Mouse  
665 Cells Dependent on Physiological Oxygen. *PLoS One*. 2010;5: e9188.  
666 doi:10.1371/journal.pone.0009188
- 667 4. Kuilman T, Michaloglou C, Vredeveld LCW, Douma S, van Doorn R, Desmet CJ, et  
668 al. Oncogene-induced senescence relayed by an interleukin-dependent  
669 inflammatory network. *Cell*. 2008;133: 1019–1031. doi:10.1016/j.cell.2008.03.039
- 670 5. Neves J, Demaria M, Campisi J, Jasper H. Of flies, mice, and men: evolutionarily  
671 conserved tissue damage responses and aging. *Dev Cell*. 2015;32: 9–18.  
672 doi:10.1016/j.devcel.2014.11.028
- 673 6. Tchkonja T, Zhu Y, van Deursen J, Campisi J, Kirkland JL. Cellular senescence  
674 and the senescent secretory phenotype: therapeutic opportunities. *J Clin Invest*.  
675 2013;123: 966–72. doi:10.1172/JCI64098

- 676 7. Tominaga K. The emerging role of senescent cells in tissue homeostasis and  
677 pathophysiology. *Pathobiol Aging Age Relat Dis*. 2015;5.  
678 doi:10.3402/pba.v5.27743
- 679 8. Baker DJ, Wijshake T, Tchkonia T, LeBrasseur NK, Childs BG, van de Sluis B, et  
680 al. Clearance of p16<sup>Ink4a</sup>-positive senescent cells delays ageing-associated  
681 disorders. *Nature*. 2011;479: 232–236. doi:10.1038/nature10600
- 682 9. Demaria M, Ohtani N, Youssef SA, Rodier F, Toussaint W, Mitchell JR, et al. An  
683 Essential Role for Senescent Cells in Optimal Wound Healing through Secretion of  
684 PDGF-AA. *Dev Cell*. 2014;31: 722–733. doi:10.1016/j.devcel.2014.11.012
- 685 10. Childs BG, Baker DJ, Wijshake T, Conover CA, Campisi J, van Deursen JM.  
686 Senescent intimal foam cells are deleterious at all stages of atherosclerosis.  
687 *Science*. 2016;354: 472–477. doi:10.1126/science.aaf6659
- 688 11. Jeon OH, David N, Campisi J, Elisseeff JH. Senescent cells and osteoarthritis: a  
689 painful connection. *J Clin Invest*. 2018;128: 1229–1237. doi:10.1172/JCI95147
- 690 12. Baar MP, Brandt RMC, Putavet DA, Klein JDD, Derks KWJ, Bourgeois BRM, et al.  
691 Targeted Apoptosis of Senescent Cells Restores Tissue Homeostasis in Response  
692 to Chemotoxicity and Aging. *Cell*. 2017;169: 132-147.e16.  
693 doi:10.1016/j.cell.2017.02.031
- 694 13. Demaria M, O’Leary MN, Chang J, Shao L, Liu S, Alimirah F, et al. Cellular  
695 Senescence Promotes Adverse Effects of Chemotherapy and Cancer Relapse.  
696 *Cancer Discov*. 2017;7: 165–176. doi:10.1158/2159-8290.CD-16-0241

- 697 14. Abdul-Aziz AM, Sun Y, Hellmich C, Marlein CR, Mistry J, Forde E, et al. Acute  
698 myeloid leukemia induces pro-tumoral p16INK4a driven senescence in the bone  
699 marrow microenvironment. *Blood*. 2018;133: 446–456. doi:10.1182/blood-2018-04-  
700 845420
- 701 15. Chang J, Wang Y, Shao L, Laberge RM, Demaria M, Campisi J, et al. Clearance of  
702 senescent cells by ABT263 rejuvenates aged hematopoietic stem cells in mice. *Nat*  
703 *Med*. 2016;22: 78–83. doi:10.1038/nm.4010
- 704 16. Valentijn FA, Falke LL, Nguyen TQ, Goldschmeding R. Cellular senescence in the  
705 aging and diseased kidney. *J Cell Commun Signal*. 2018;12: 69–82.  
706 doi:10.1007/s12079-017-0434-2
- 707 17. Baker DJ, Childs BG, Durik M, Wijers ME, Sieben CJ, Zhong J, et al. Naturally  
708 occurring p16(Ink4a)-positive cells shorten healthy lifespan. *Nature*. 2016;530:  
709 184–9. doi:10.1038/nature16932
- 710 18. Wiley C, Liu S, Limbad C, Zawadzka A, Beck J, Demaria M, et al. SILAC analysis  
711 reveals increased secretion of hemostasis-related factors by senescent cells. *Cell*  
712 *Reports*. 2019;Forthcoming. Available: <https://papers.ssrn.com/abstract=3155773>
- 713 19. Hernandez-Vallejo SJ, Beaupere C, Larghero J, Capeau J, Lagathu C. HIV  
714 protease inhibitors induce senescence and alter osteoblastic potential of human  
715 bone marrow mesenchymal stem cells: beneficial effect of pravastatin. *Aging Cell*.  
716 2013;12: 955–965. doi:10.1111/acel.12119

- 717 20. Sedelnikova OA, Redon CE, Dickey JS, Nakamura AJ, Georgakilas AG, Bonner  
718 WM. Role of oxidatively induced DNA lesions in human pathogenesis. *Mutat Res.*  
719 2010;704: 152–159. doi:10.1016/j.mrrev.2009.12.005
- 720 21. Di Micco R, Fumagalli M, Cicalese A, Piccinin S, Gasparini P, Luise C, et al.  
721 Oncogene-induced senescence is a DNA damage response triggered by DNA  
722 hyper-replication. *Nature.* 2006;444: 638–642. doi:10.1038/nature05327
- 723 22. Rodier F, Coppé JP, Patil CK, Hoeijmakers WA, Muñoz DP, Raza SR, et al.  
724 Persistent DNA damage signalling triggers senescence-associated inflammatory  
725 cytokine secretion. *Nat Cell Biol.* 2009;11: 973–9. doi:10.1038/ncb1909
- 726 23. Coppé J-P, Desprez P-Y, Krtolica A, Campisi J. The Senescence-Associated  
727 Secretory Phenotype: The Dark Side of Tumor Suppression. *Annu Rev Pathol.*  
728 2010;5: 99–118. doi:10.1146/annurev-pathol-121808-102144
- 729 24. Hernandez-Segura A, de Jong TV, Melov S, Guryev V, Campisi J, Demaria M.  
730 Unmasking Transcriptional Heterogeneity in Senescent Cells. *Curr Biol.* 2017;27:  
731 2652-2660.e4. doi:10.1016/j.cub.2017.07.033
- 732 25. Özcan S, Alessio N, Acar MB, Mert E, Omerli F, Peluso G, et al. Unbiased analysis  
733 of senescence associated secretory phenotype (SASP) to identify common  
734 components following different genotoxic stresses. *Aging (Albany NY).* 2016;8:  
735 1316–1327. doi:10.18632/aging.100971
- 736 26. Borghesan M, Fafián-Labora J, Eleftheriadou O, Carpintero-Fernández P, Paez-  
737 Ribes M, Vizcay-Barrena G, et al. Small Extracellular Vesicles Are Key Regulators

- 738 of Non-cell Autonomous Intercellular Communication in Senescence via the  
739 Interferon Protein IFITM3. *Cell Reports*. 2019;27: 3956-3971.e6.  
740 doi:10.1016/j.celrep.2019.05.095
- 741 27. Lehmann BD, Paine MS, Brooks AM, McCubrey JA, Renegar RH, Wang R, et al.  
742 Senescence-associated exosome release from human prostate cancer cells.  
743 *Cancer Res*. 2008;68: 7864–7871. doi:10.1158/0008-5472.CAN-07-6538
- 744 28. Takasugi M. Emerging roles of extracellular vesicles in cellular senescence and  
745 aging. *Aging Cell*. 2018;17. doi:10.1111/acer.12734
- 746 29. Jeon OH, Wilson DR, Clement CC, Rathod S, Cherry C, Powell B, et al.  
747 Senescence cell-associated extracellular vesicles serve as osteoarthritis disease  
748 and therapeutic markers. *JCI Insight*. 2019;4. doi:10.1172/jci.insight.125019
- 749 30. Gillet LC, Navarro P, Tate S, Röst H, Selevsek N, Reiter L, et al. Targeted data  
750 extraction of the MS/MS spectra generated by data-independent acquisition: a new  
751 concept for consistent and accurate proteome analysis. *Mol Cell Proteomics*.  
752 2012;11: O111.016717. doi:10.1074/mcp.O111.016717
- 753 31. Schilling B, Gibson BW, Hunter CL. Generation of High-Quality SWATH®  
754 Acquisition Data for Label-free Quantitative Proteomics Studies Using TripleTOF®  
755 Mass Spectrometers. *Methods Mol Biol*. 2017;1550: 223–233. doi:10.1007/978-1-  
756 4939-6747-6\_16
- 757 32. Bruderer R, Bernhardt OM, Gandhi T, Miladinović SM, Cheng LY, Messner S, et al.  
758 Extending the limits of quantitative proteome profiling with data-independent



- 759 acquisition and application to acetaminophen-treated three-dimensional liver  
760 microtissues. *Mol Cell Proteomics*. 2015;14: 1400–10.  
761 doi:10.1074/mcp.M114.044305
- 762 33. Bindea G, Mlecnik B, Hackl H, Charoentong P, Tosolini M, Kirilovsky A, et al.  
763 ClueGO: a Cytoscape plug-in to decipher functionally grouped gene ontology and  
764 pathway annotation networks. *Bioinformatics*. 2009;25: 1091–1093.  
765 doi:10.1093/bioinformatics/btp101
- 766 34. Shannon P, Markiel A, Ozier O, Baliga NS, Wang JT, Ramage D, et al. Cytoscape:  
767 a software environment for integrated models of biomolecular interaction networks.  
768 *Genome Res*. 2003;13: 2498–2504. doi:10.1101/gr.1239303
- 769 35. Kaur G, Levy E. Cystatin C in Alzheimer’s disease. *Front Mol Neurosci*. 2012;5.  
770 doi:10.3389/fnmol.2012.00079
- 771 36. O’Brien RJ, Wong PC. Amyloid Precursor Protein Processing and Alzheimer’s  
772 Disease. *Annu Rev Neurosci*. 2011;34: 185–204. doi:10.1146/annurev-neuro-  
773 061010-113613
- 774 37. Bonifati V, Rizzu P, van Baren MJ, Schaap O, Breedveld GJ, Krieger E, et al.  
775 Mutations in the DJ-1 gene associated with autosomal recessive early-onset  
776 parkinsonism. *Science*. 2003;299: 256–259. doi:10.1126/science.1077209
- 777 38. Chang AC-M, Doherty J, Huschtscha LI, Redvers R, Restall C, Reddel RR, et al.  
778 STC1 expression is associated with tumor growth and metastasis in breast cancer.  
779 *Clin Exp Metastasis*. 2015;32: 15–27. doi:10.1007/s10585-014-9687-9

- 780 39. Du Y-Z, Gu X-H, Cheng S-F, Li L, Liu H, Hu L-P, et al. The oncogenetic role of  
781 stanniocalcin 1 in lung adenocarcinoma: a promising serum candidate biomarker  
782 for tracking lung adenocarcinoma progression. *Tumour Biol.* 2016;37: 5633–5644.  
783 doi:10.1007/s13277-015-4431-x
- 784 40. Ohkouchi S, Ono M, Kobayashi M, Hirano T, Tojo Y, Hisata S, et al. Myriad  
785 Functions of Stanniocalcin-1 (STC1) Cover Multiple Therapeutic Targets in the  
786 Complicated Pathogenesis of Idiopathic Pulmonary Fibrosis (IPF). *Clin Med  
787 Insights Circ Respir Pulm Med.* 2015;9: 91–96. doi:10.4137/CCRPM.S23285
- 788 41. Pan JS-C, Huang L, Belousova T, Lu L, Yang Y, Reddel R, et al. Stanniocalcin-1  
789 Inhibits Renal Ischemia/Reperfusion Injury via an AMP-Activated Protein Kinase-  
790 Dependent Pathway. *J Am Soc Nephrol.* 2015;26: 364–378.  
791 doi:10.1681/ASN.2013070703
- 792 42. Shahim P, Blennow K, Johansson P, Svensson J, Lista S, Hampel H, et al.  
793 Cerebrospinal Fluid Stanniocalcin-1 as a Biomarker for Alzheimer’s Disease and  
794 Other Neurodegenerative Disorders. *Neuromolecular Med.* 2017;19: 154–160.  
795 doi:10.1007/s12017-016-8439-1
- 796 43. Su J, Guo B, Zhang T, Wang K, Li X, Liang G. Stanniocalcin-1, a new biomarker of  
797 glioma progression, is associated with prognosis of patients. *Tumour Biol.* 2015;36:  
798 6333–6339. doi:10.1007/s13277-015-3319-0

- 799 44. Davalos AR, Kawahara M, Malhotra GK, Schaum N, Huang J, Ved U, et al. p53-  
800 dependent release of Alarmin HMGB1 is a central mediator of senescent  
801 phenotypes. *J Cell Biol.* 2013;201: 613–629. doi:10.1083/jcb.201206006
- 802 45. Keerthikumar S, Chisanga D, Ariyaratne D, Al Saffar H, Anand S, Zhao K, et al.  
803 ExoCarta: A Web-Based Compendium of Exosomal Cargo. *Journal of Molecular*  
804 *Biology.* 2016;428: 688–692. doi:10.1016/j.jmb.2015.09.019
- 805 46. Belov L, Matic KJ, Hallal S, Best OG, Mulligan SP, Christopherson RI. Extensive  
806 surface protein profiles of extracellular vesicles from cancer cells may provide  
807 diagnostic signatures from blood samples. *J Extracell Vesicles.* 2016;5.  
808 doi:10.3402/jev.v5.25355
- 809 47. Tanaka T, Biancotto A, Moaddel R, Moore AZ, Gonzalez-Freire M, Aon MA, et al.  
810 Plasma proteomic signature of age in healthy humans. *Aging Cell.* 2018;17:  
811 e12799. doi:10.1111/accel.12799
- 812 48. Acosta JC, Banito A, Wuestefeld T, Georgilis A, Janich P, Morton JP, et al. A  
813 complex secretory program orchestrated by the inflammasome controls paracrine  
814 senescence. *Nat Cell Biol.* 2013;15: 978–90. doi:10.1038/ncb2784
- 815 49. Nelson G, Wordsworth J, Wang C, Jurk D, Lawless C, Martin-Ruiz C, et al. A  
816 senescent cell bystander effect: senescence-induced senescence. *Aging Cell.*  
817 2012;11: 345–349. doi:10.1111/j.1474-9726.2012.00795.x

- 818 50. Egertson JD, MacLean B, Johnson R, Xuan Y, MacCoss MJ. Multiplexed peptide  
819 analysis using data-independent acquisition and Skyline. *Nature Protocols*.  
820 2015;10: 887.
- 821 51. Rardin MJ, Schilling B, Cheng LY, MacLean BX, Sorensen DJ, Sahu AK, et al.  
822 MS1 Peptide Ion Intensity Chromatograms in MS2 (SWATH) Data Independent  
823 Acquisitions. Improving Post Acquisition Analysis of Proteomic Experiments. *Mol*  
824 *Cell Proteomics*. 2015;14: 2405–19. doi:10.1074/mcp.O115.048181
- 825 52. Sharma V, Eckels J, Taylor GK, Shulman NJ, Stergachis AB, Joyner SA, et al.  
826 Panorama: A Targeted Proteomics Knowledge Base. *J Proteome Res*. 2014;13:  
827 4205–4210. doi:10.1021/pr5006636
- 828 53. Sharma V, Eckels J, Schilling B, Ludwig C, Jaffe JD, MacCoss MJ, et al. Panorama  
829 Public: A Public Repository for Quantitative Data Sets Processed in Skyline. *Mol*  
830 *Cell Proteomics*. 2018;17: 1239–1244. doi:10.1074/mcp.RA117.000543
- 831 54. Feldman N, Rotter-Maskowitz A, Okun E. DAMPs as mediators of sterile  
832 inflammation in aging-related pathologies. *Ageing Res Rev*. 2015;24: 29–39.  
833 doi:10.1016/j.arr.2015.01.003
- 834 55. Huang J, Xie Y, Sun X, Zeh HJ, Kang R, Lotze MT, et al. DAMPs, Ageing, and  
835 Cancer: The ‘DAMP Hypothesis.’ *Ageing Res Rev*. 2015;24: 3–16.  
836 doi:10.1016/j.arr.2014.10.004

- 837 56. Franceschi C, Campisi J. Chronic inflammation (inflammaging) and its potential  
838 contribution to age-associated diseases. *J Gerontol A Biol Sci Med Sci.* 2014;69  
839 Suppl 1: S4-9. doi:10.1093/gerona/glu057
- 840 57. Fucikova J, Moserova I, Urbanova L, Bezu L, Kepp O, Cremer I, et al. Prognostic  
841 and Predictive Value of DAMPs and DAMP-Associated Processes in Cancer. *Front*  
842 *Immunol.* 2015;6. doi:10.3389/fimmu.2015.00402
- 843 58. Garg AD, Galluzzi L, Apetoh L, Baert T, Birge RB, Bravo-San Pedro JM, et al.  
844 Molecular and Translational Classifications of DAMPs in Immunogenic Cell Death.  
845 *Front Immunol.* 2015;6. doi:10.3389/fimmu.2015.00588
- 846 59. Bidadkosh A, Lambooy SPH, Heerspink HJ, Pena MJ, Henning RH, Buikema H, et  
847 al. Predictive Properties of Biomarkers GDF-15, NTproBNP, and hs-TnT for  
848 Morbidity and Mortality in Patients With Type 2 Diabetes With Nephropathy.  
849 *Diabetes Care.* 2017;40: 784–792. doi:10.2337/dc16-2175
- 850 60. Daniels LB, Clopton P, Laughlin GA, Maisel AS, Barrett-Connor E. Growth-  
851 differentiation factor-15 is a robust, independent predictor of 11-year mortality risk  
852 in community-dwelling older adults: the Rancho Bernardo Study. *Circulation.*  
853 2011;123: 2101–2110. doi:10.1161/CIRCULATIONAHA.110.979740
- 854 61. Ho JE, Mahajan A, Chen M-H, Larson MG, McCabe EL, Ghorbani A, et al. Clinical  
855 and genetic correlates of growth differentiation factor 15 in the community. *Clin*  
856 *Chem.* 2012;58: 1582–1591. doi:10.1373/clinchem.2012.190322

- 857 62. Ho JE, Hwang S-J, Wollert KC, Larson MG, Cheng S, Kempf T, et al. Biomarkers  
858 Of Cardiovascular Stress And Incident Chronic Kidney Disease. *Clin Chem.*  
859 2013;59: 1613–1620. doi:10.1373/clinchem.2013.205716
- 860 63. Rohatgi A, Patel P, Das SR, Ayers CR, Khera A, Martinez-Rumayor A, et al.  
861 Association of growth differentiation factor-15 with coronary atherosclerosis and  
862 mortality in a young, multiethnic population: observations from the Dallas Heart  
863 Study. *Clin Chem.* 2012;58: 172–182. doi:10.1373/clinchem.2011.171926
- 864 64. Wallentin L, Zethelius B, Berglund L, Eggers KM, Lind L, Lindahl B, et al. GDF-15  
865 for prognostication of cardiovascular and cancer morbidity and mortality in men.  
866 *PLoS ONE.* 2013;8: e78797. doi:10.1371/journal.pone.0078797
- 867 65. Wollert KC, Kempf T, Wallentin L. Growth Differentiation Factor 15 as a Biomarker  
868 in Cardiovascular Disease. *Clinical Chemistry.* 2017;63: 140–151.  
869 doi:10.1373/clinchem.2016.255174
- 870 66. Bhat R, Crowe EP, Bitto A, Moh M, Katsetos CD, Garcia FU, et al. Astrocyte  
871 senescence as a component of Alzheimer’s disease. *PLoS ONE.* 2012;7: e45069.  
872 doi:10.1371/journal.pone.0045069
- 873 67. Chen Y-K, Tung C-W, Lee J-Y, Hung Y-C, Lee C-H, Chou S-H, et al. Plasma  
874 matrix metalloproteinase 1 improves the detection and survival prediction of  
875 esophageal squamous cell carcinoma. *Scientific Reports.* 2016;6: 30057.  
876 doi:10.1038/srep30057

- 877 68. Rosas IO, Richards TJ, Konishi K, Zhang Y, Gibson K, Lokshin AE, et al. MMP1  
878 and MMP7 as Potential Peripheral Blood Biomarkers in Idiopathic Pulmonary  
879 Fibrosis. *PLoS Med.* 2008;5. doi:10.1371/journal.pmed.0050093
- 880 69. Roy R, Yang J, Moses MA. Matrix Metalloproteinases As Novel Biomarkers and  
881 Potential Therapeutic Targets in Human Cancer. *J Clin Oncol.* 2009;27: 5287–  
882 5297. doi:10.1200/JCO.2009.23.5556
- 883 70. Théry C, Amigorena S, Raposo G, Clayton A. Isolation and characterization of  
884 exosomes from cell culture supernatants and biological fluids. *Curr Protoc Cell Biol.*  
885 2006;Chapter 3: Unit 3.22. doi:10.1002/0471143030.cb0322s30
- 886 71. Collins BC, Hunter CL, Liu Y, Schilling B, Rosenberger G, Bader SL, et al. Multi-  
887 laboratory assessment of reproducibility, qualitative and quantitative performance  
888 of SWATH-mass spectrometry. *Nature Communications.* 2017;8: 291.  
889 doi:10.1038/s41467-017-00249-5
- 890 72. Rosenberger G, Koh CC, Guo T, Röst HL, Kouvonen P, Collins BC, et al. A  
891 repository of assays to quantify 10,000 human proteins by SWATH-MS. *Sci Data.*  
892 2014;1: 140031. doi:10.1038/sdata.2014.31
- 893 73. Pedregosa F, Varoquaux G, Gramfort A, Michel V, Thirion B, Grisel O, et al. Scikit-  
894 learn: Machine Learning in Python. *Journal of Machine Learning Research.*  
895 2011;12: 2825–2830.

- 896 74. Warnes GR, Bolker B, Bonebakker L, Gentleman R, Liaw WHA, Lumley T, et al.  
897 gplots: Various R Programming Tools for Plotting Data [Internet]. 2019. Available:  
898 <https://CRAN.R-project.org/package=gplots>
- 899 75. Chen H. VennDiagram: Generate High-Resolution Venn and Euler Plots [Internet].  
900 2018. Available: <https://CRAN.R-project.org/package=VennDiagram>
- 901 76. Neuwirth E. RColorBrewer: ColorBrewer Palettes [Internet]. 2014. Available:  
902 <https://CRAN.R-project.org/package=RColorBrewer>
- 903



904 **Supporting Information: 5 figures, 5 tables:**

905 **Fig S1: Senescence markers induced by IR, RAS and ATV.** (A) Representative  
906 images of SA- $\beta$ -Gal staining of senescent and control (quiescent) primary human lung  
907 fibroblasts and renal epithelial cells following induction of senescence by either IR, RAS  
908 or ATV. (B) Quantification of SA- $\beta$ -Gal positive cells. (C) Levels of p16<sup>INK4a</sup> and Il-6  
909 mRNAs determined by qPCR and expressed as fold change of senescent over control  
910 (red line) cells. (D) Commonly reported SASP factors for each inducer, cell type and  
911 fraction. IR = X-irradiation, RAS = RAS oncogene overexpression, ATV = atazanavir  
912 treatment, Fib = fibroblasts, Epi = renal epithelial cells.

913

914 **Fig S2: Cell viability assays.** (A) Amount of cell death over a 24-hour period as  
915 determined by Sytox Green viability dye assay. (B) Fraction of viable cells measured by  
916 exclusion of propidium iodide fluorescence, assessed by flow cytometry.

917

918 **Fig S3: Western Blot Confirmation of top core SASP factors.** (A) Western blot  
919 exposures of top core SASP factors, GDF15, STC1, SERPINE1, and MMP1, in non-  
920 senescent control fibroblasts, early senescent fibroblasts (4 days RAS induction), and  
921 fully senescent fibroblasts (7 days RAS induction). (B) Densitometry analysis of western  
922 blot. \*P-value < 0.05 versus CTL.

923

924 **Fig S4: Exosome/EV proteomic markers and size distribution analysis.** (A) Table of  
925 exosome and EV-specific markers identified in exosome and soluble fractions of  
926 fibroblasts by mass spectrometry. Multiple peptides from defining exosome/EV markers

927 were identified in the exosome fractions of RAS and IR-induced senescence  
928 experiments but none were detected in the soluble fractions. (B) Table showing EVs  
929 secreted per cell and average EV diameter in senescent and control cells in complete  
930 (10% FBS) medium and low-serum (0.2% FBS) medium. (C) Size distribution analysis  
931 of EVs secreted by senescent and control cells in complete and low-serum medium. (D)  
932 Exosome/EV-specific markers detected in isolated EV fractions in each treatment  
933 group, as measured by MACSPlex exosome detection kit. (E) Median levels of every  
934 surface marker measured in exosome/EV fractions by MACSPlex exosome detection  
935 kit. IR = X-irradiation, RAS = RAS oncogene overexpression, FBS = fetal bovine serum.  
936

937 **Fig S5: Comparison of proteomic and transcriptomic changes in the fibroblast**  
938 **SASP.** Transcriptomic changes in the SASP of fibroblasts reported in a recent meta-  
939 analysis (23) (Hernandez-Segura et al., 2017) was compared with proteomic changes in  
940 the SASP of the current study. (A) Comparison of transcriptomic meta-analysis and  
941 proteomic analysis of secretomes in IR-induced senescent cells compared with non-  
942 senescent cells. (B) Venn diagram comparing RAS-induced senescence changes at  
943 the transcriptome and secreted proteome level. (C) Venn diagram of the core  
944 senescent transcriptome signature (genes changed at senescence regardless of  
945 inducer) versus changes common to IR and RAS induced senescence at the secreted  
946 proteome level. (D) Venn diagram comparing the senescent transcriptome and  
947 secreted proteome core signatures. IR = x-irradiation, RAS = RAS oncogene  
948 overexpression.  
949

950 **Table S1:** Mass spectrometry quantification for each dataset as separate worksheets in  
951 a single excel workbook.

952

953 **Table S2:** Proteins with significantly increased secretion in response to all senescence-  
954 inducers.

955

956 **Table S3:** Proteins with significantly increased secretion in all cell types in response to  
957 all senescence inducers.

958

959 **Table S4:** Age-associated plasma proteins also present in the SASP as determined in  
960 our proteomics experiments.

961

962 **Table S5:** Reagents and Resources.

|                         | Secretome                   | Exosomes                     | Cell Type    |                              |
|-------------------------|-----------------------------|------------------------------|--------------|------------------------------|
| <b>IR</b><br>Genotoxic  | 1505 Proteins<br>548 ↑ 37 ↓ | 1502 Proteins<br>180 ↑ 320 ↓ | <b>Fibro</b> | 1505 Proteins<br>548 ↑ 37 ↓  |
| <b>RAS</b><br>Oncogenic | 1693 Proteins<br>704 ↑ 10 ↓ | 354 Proteins<br>21 ↑ 18 ↓    | <b>Epi</b>   | 1181 Proteins<br>208 ↑ 141 ↓ |
| <b>ATV</b><br>Treatment | 441 Proteins<br>332 ↑ 8 ↓   |                              |              |                              |

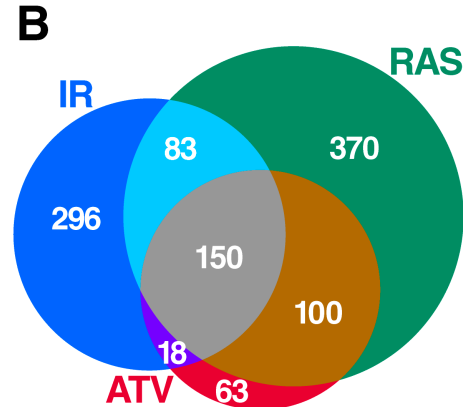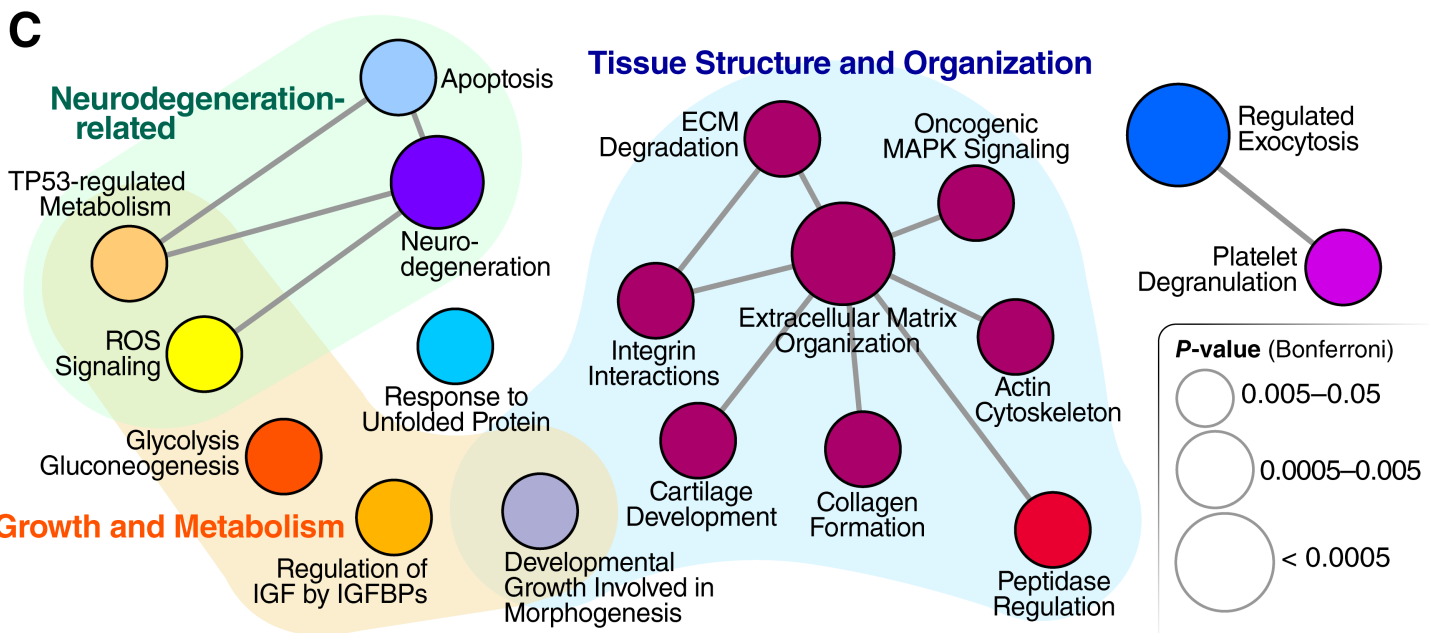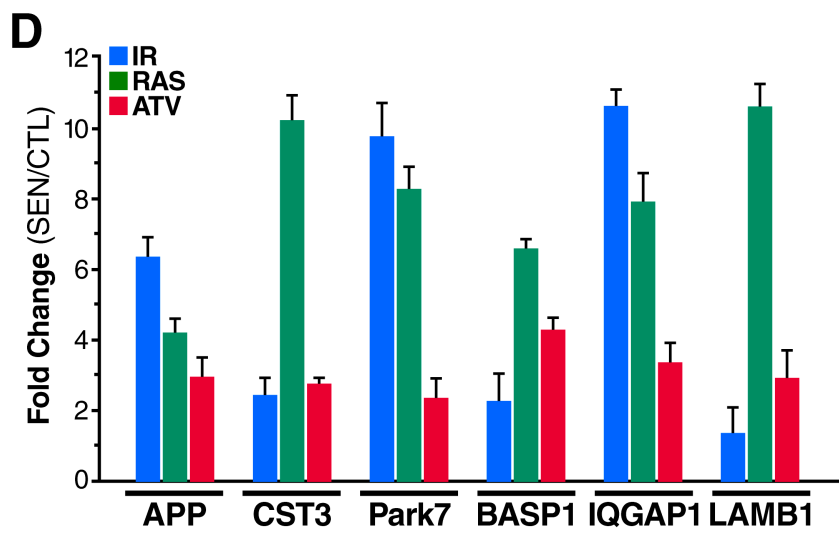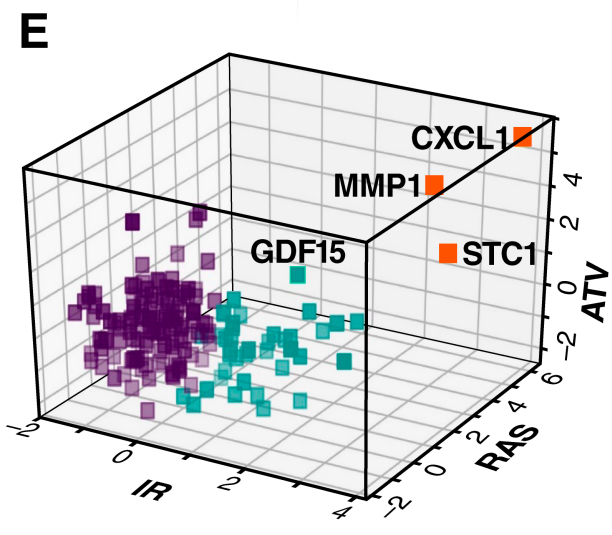

Fibroblasts  
Epithelial Cells

IR  
RAS  
ATV

Mock  
DMSO  
DMSO

*Induction*

SEN

CTL

Conditioned  
Medium

Soluble  
Proteins

Exosomes

*Digestion*

*Data-independent Acquisition  
Mass Spectrometry*

*Protein Identification and Quantification*

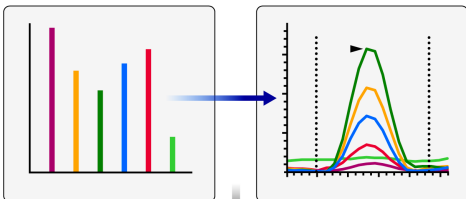

*Bioinformatics*

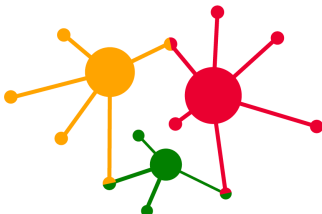

## A IR-induced senescence

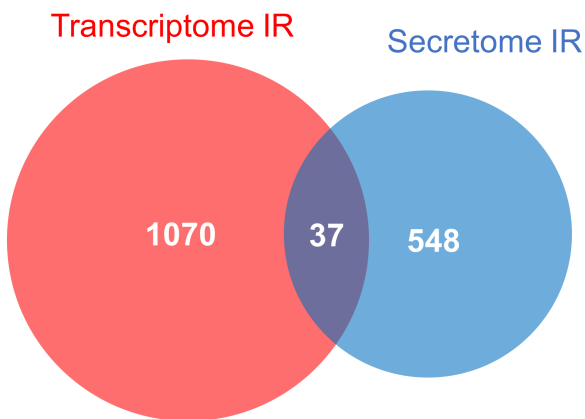

## B RAS-induced senescence

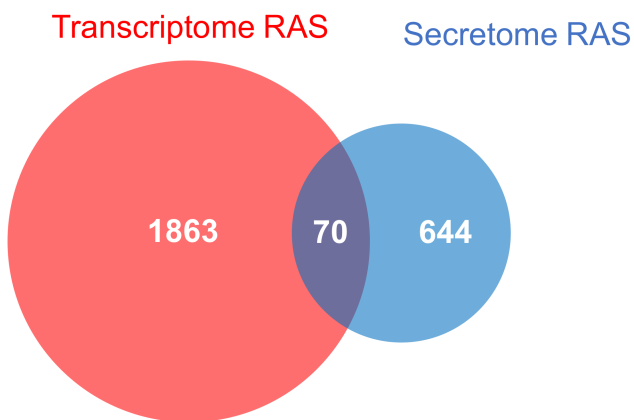

## C RAS + IR-induced senescence

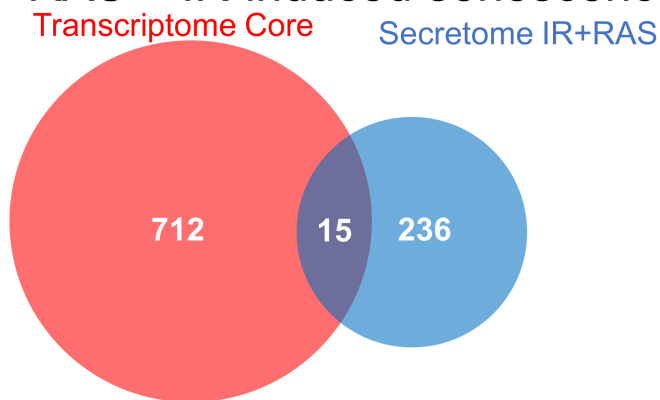

## D Senescence 'Core' Signature

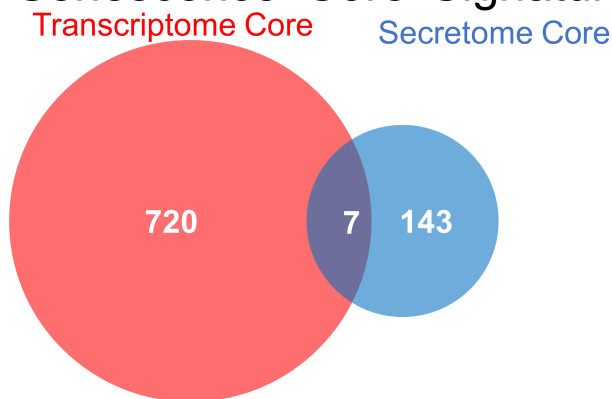

**D**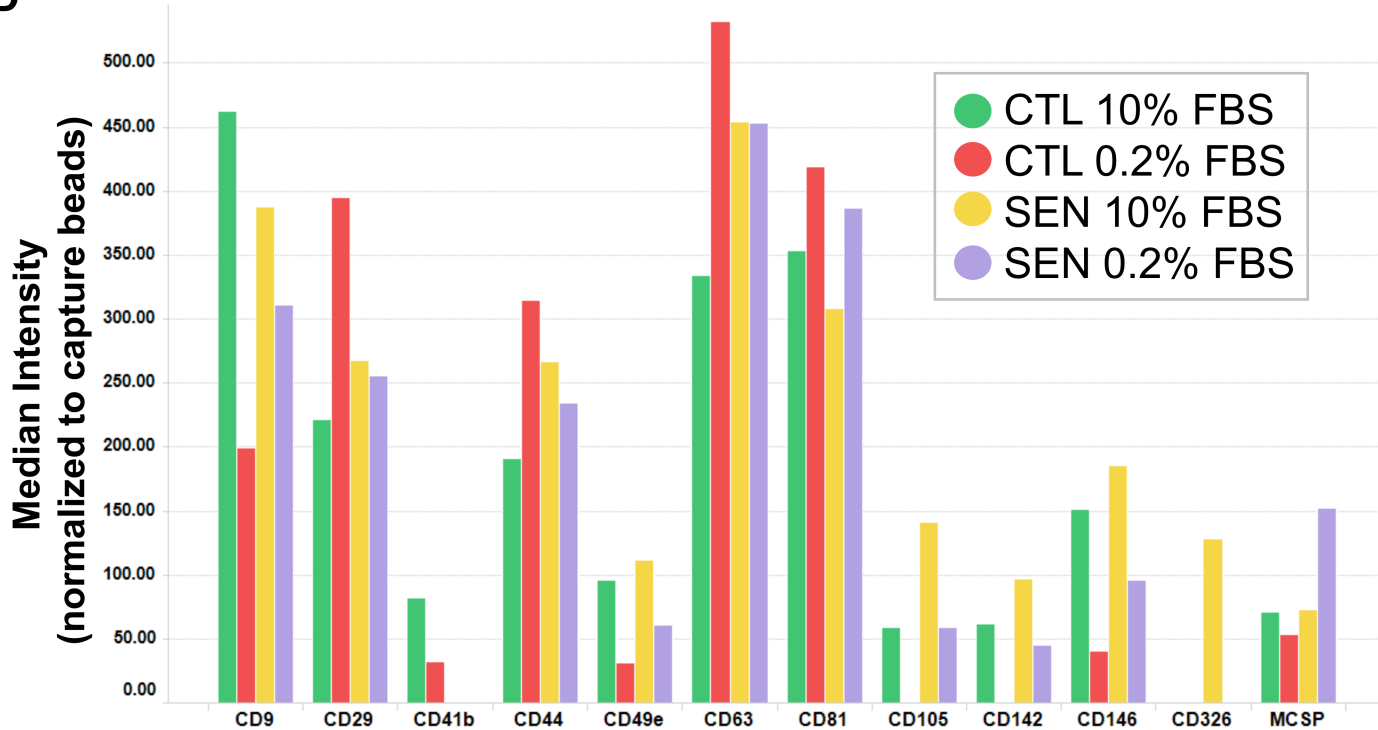**E**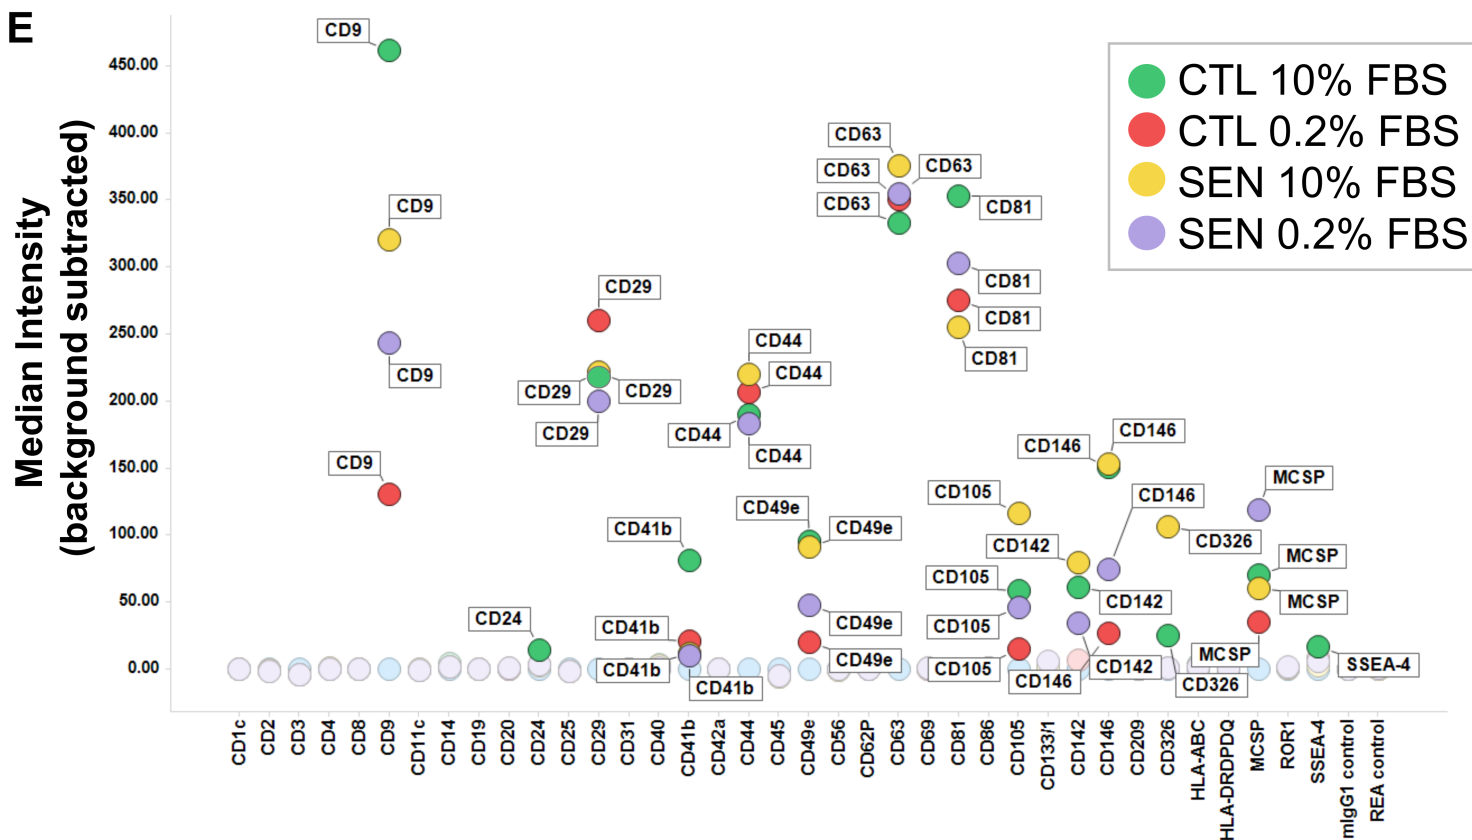

**A** Number of unique peptides

|       | Exosome/EV Fraction |     | Soluble Fraction |     |
|-------|---------------------|-----|------------------|-----|
|       | IR                  | RAS | IR               | RAS |
| CD63  | 6                   | 6   | 0                | 0   |
| CD9   | 7                   | 7   | 0                | 0   |
| CD81  | 5                   | 5   | 0                | 0   |
| CDC42 | 20                  | 20  | 0                | 0   |

|              | EVs/Cell | Avg diameter (nm) |
|--------------|----------|-------------------|
| CTL 10% FBS  | 100.88   | 154               |
| CTL 0.2% FBS | 49.90    | 150               |
| SEN 10% FBS  | 67.86    | 147               |
| SEN 0.2% FBS | 467.60   | 143               |

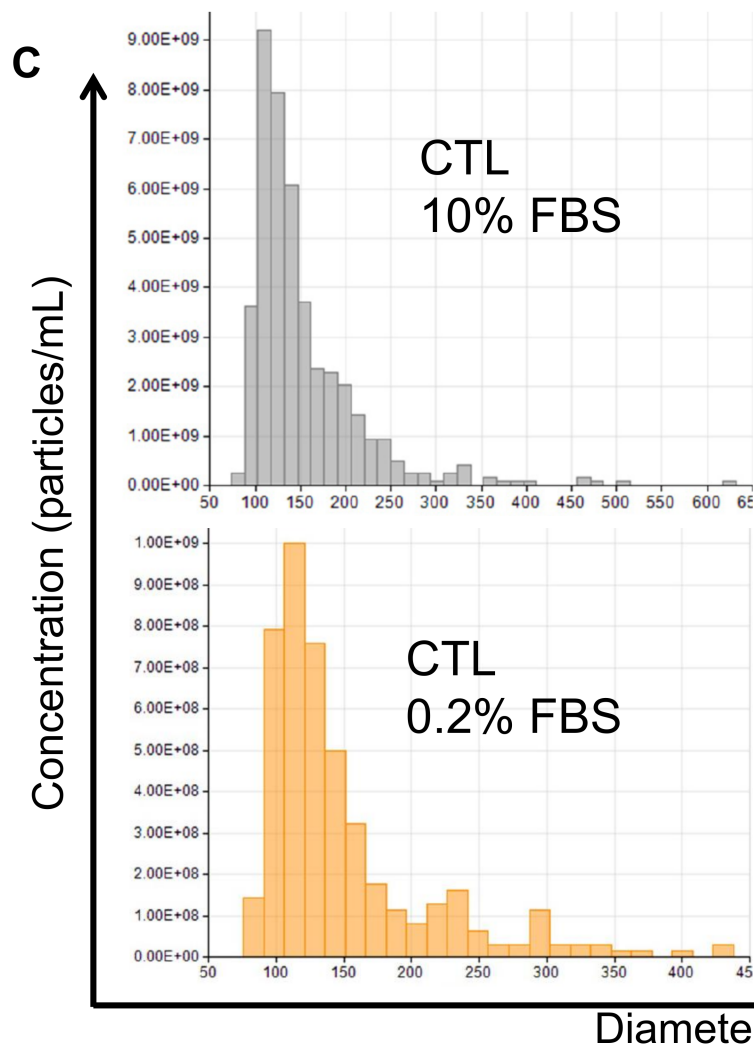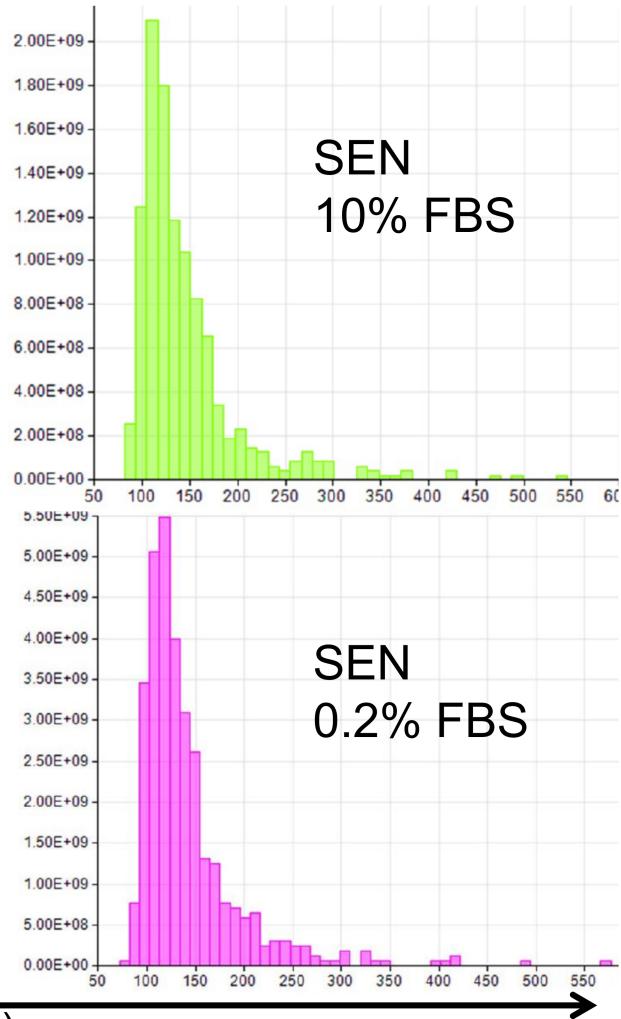



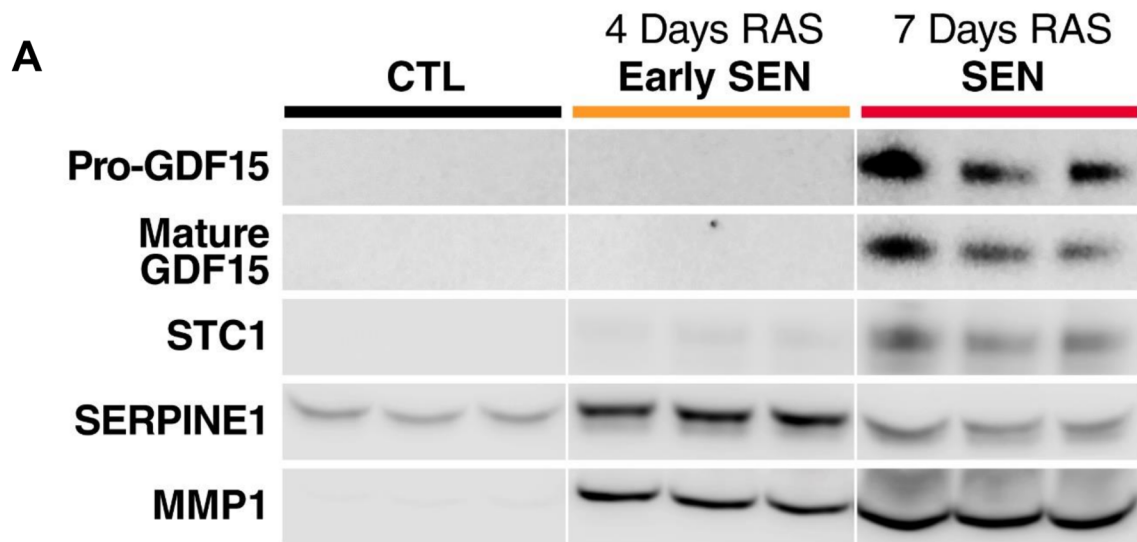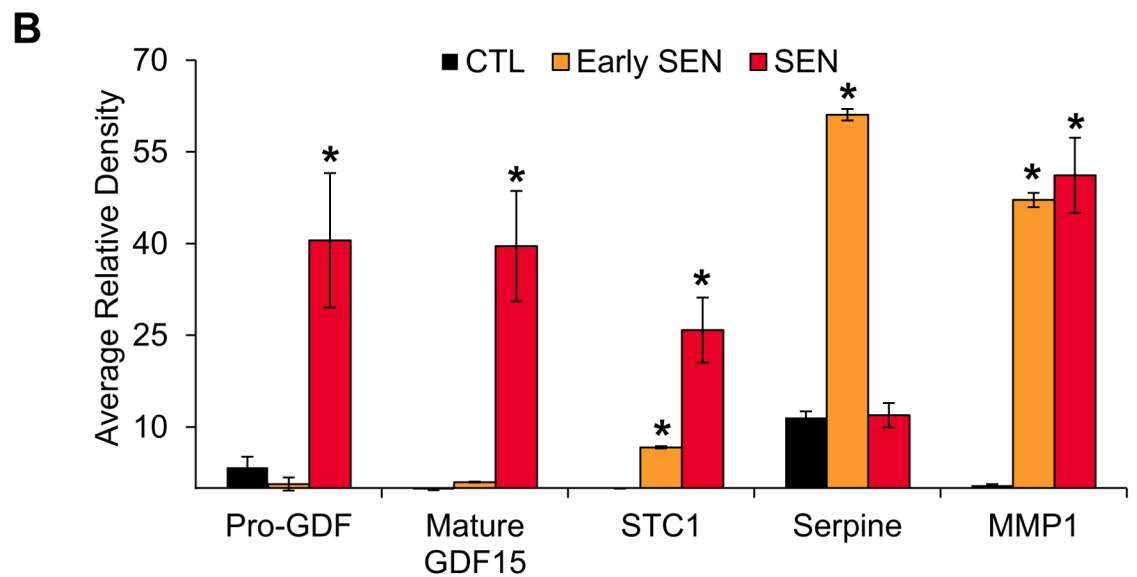

**A** Cell Death (%)

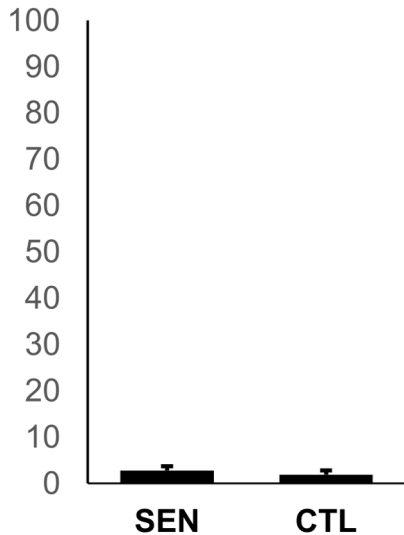

**B** Viable Cells (%)

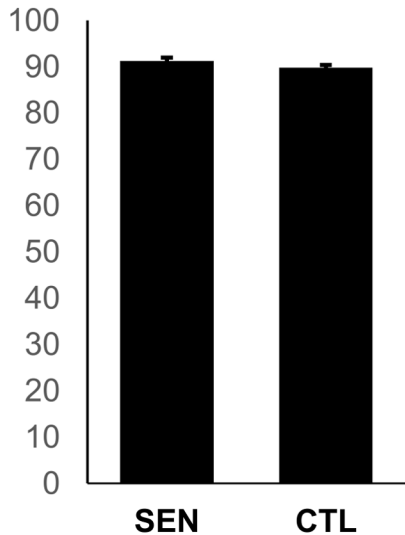

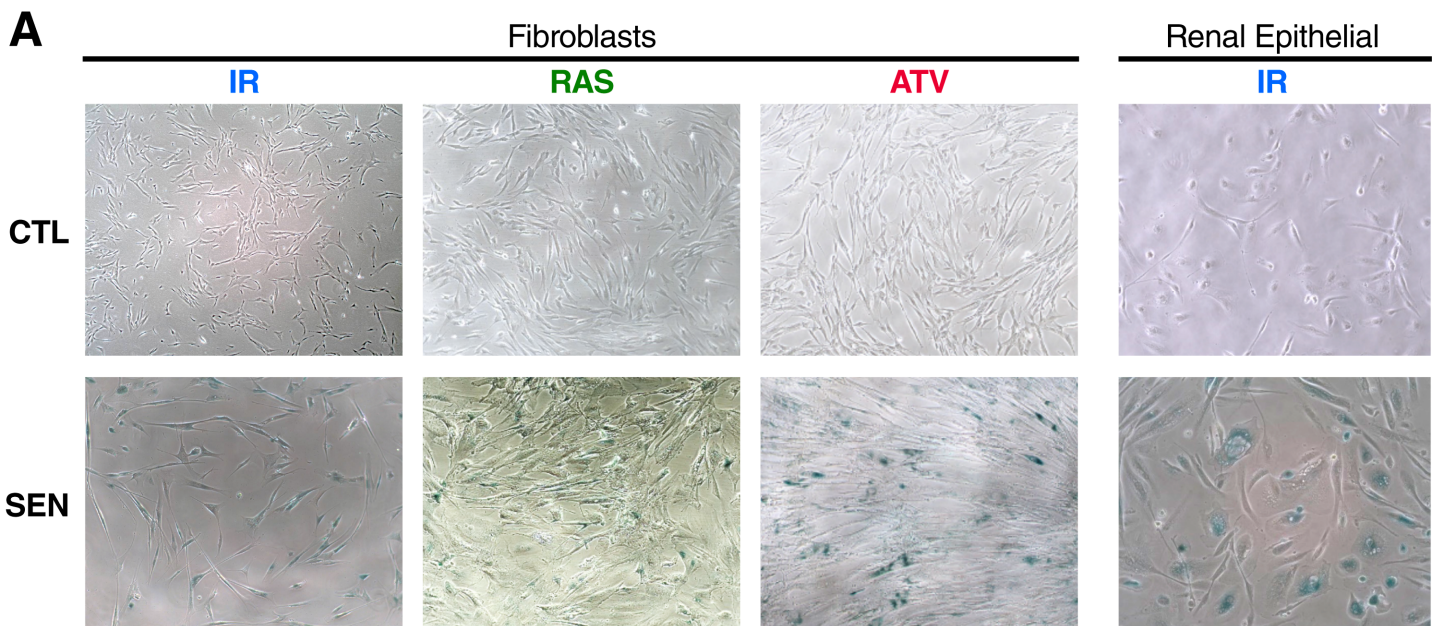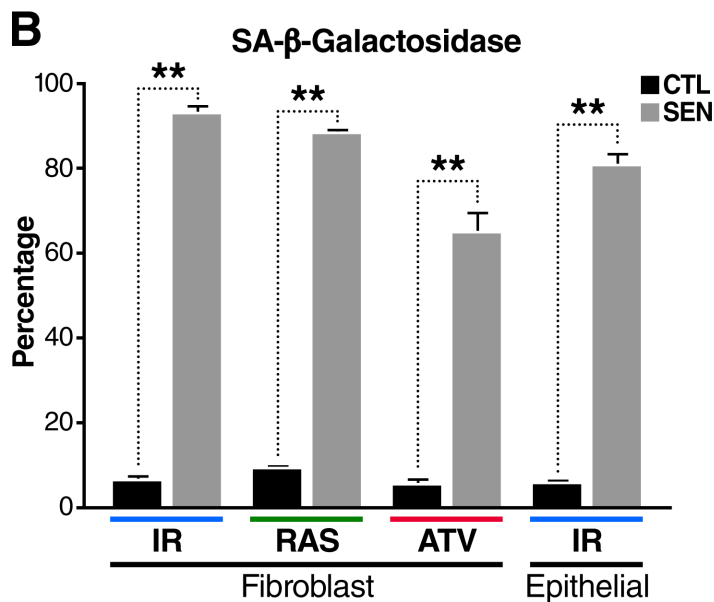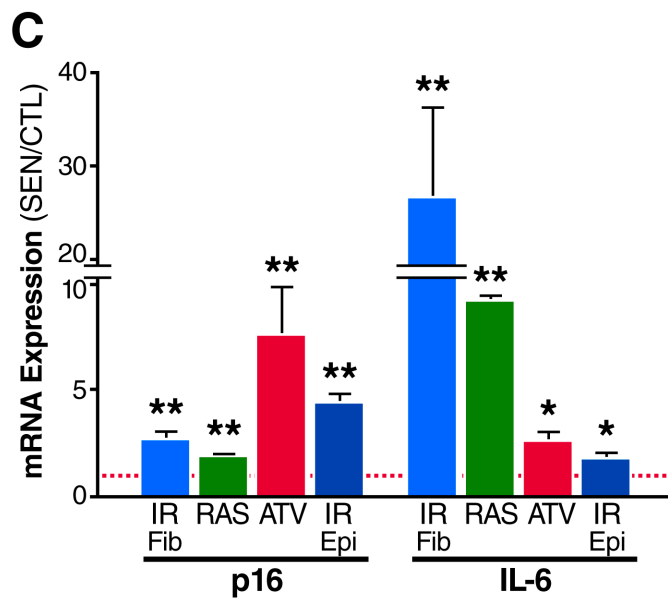

**C**

|          | Proteins         | RNA   |       | Activity |
|----------|------------------|-------|-------|----------|
|          |                  | p16   | IL-6  |          |
| Fibro    | CXCL1            | ↑     | ↑     | ↑        |
|          | CXCL8            | ↑     | —     | ↑        |
|          | HMGB1            | ↑     | —     | ↑        |
| Fibro    | IGFBP: 2 3 4 5 7 | ↑↑↑↑↑ | ↑↑↑↑↑ | ↑↑↑↑↑    |
|          | MMP1             | ↑↑    | ↑↑    | ↑↑       |
|          | MMP2             | ↑↑    | ↑     | ↑↑       |
| Fibro    | LAMB1            | ↑     | ↑     | ↑↑       |
|          | TIMP1            | ↑↑    | ↑↑    | ↑↑       |
|          | TIMP2            | ↑↑    | ↑↑    | ↑↑       |
| Epi      | CXCL1            | ↓     | —     | ↑        |
|          | CXCL8            | —     | —     | —        |
| Epi      | IGFBP: 2 3 4 5 7 | ↑↓    | ↓↓    | ↑        |
|          | MMP1             | —     | —     | —        |
| Epi      | MMP2             | —     | —     | —        |
|          | LAMB1            | ↓     | —     | —        |
| Epi      | TIMP1            | ↓↓    | —     | —        |
|          | TIMP2            | ↓↓    | —     | —        |
| Exo-some | CXCL1            | —     | —     | —        |
|          | CXCL8            | —     | —     | —        |
| Exo-some | IGFBP: 2 3 4 5 7 | —↓    | ↓↓↓↓  | —        |
|          | HMGB1            | ↑     | —     | —        |

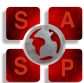

# SASP Atlas

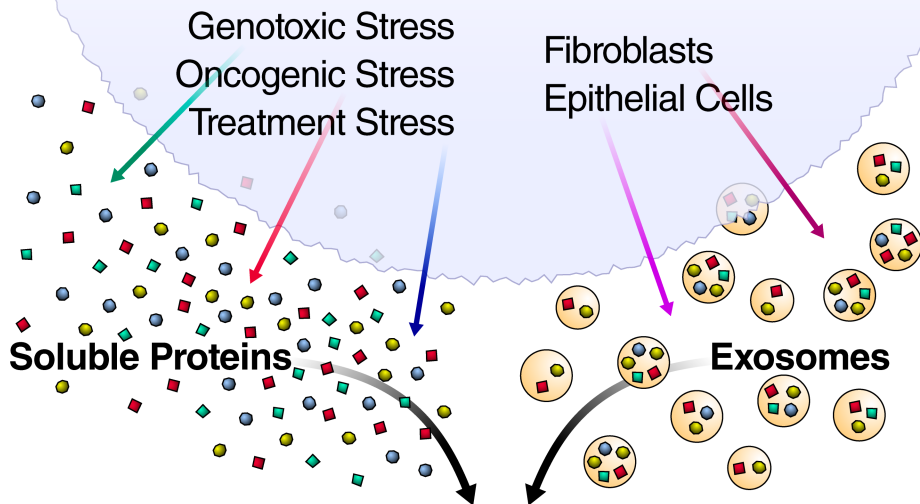

## Protein Identification, Quantification, and Bioinformatics

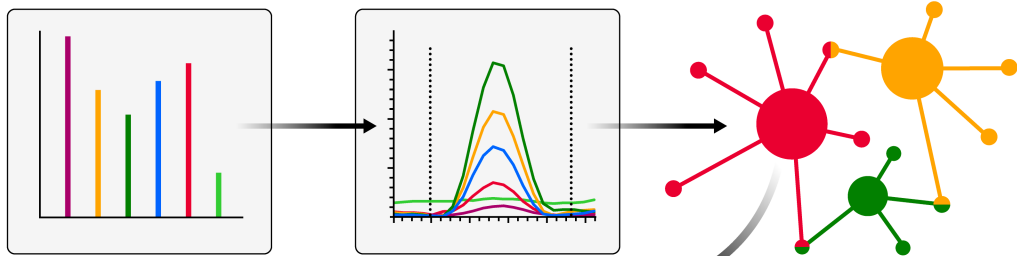

## Proteomic Panels | SASP Database

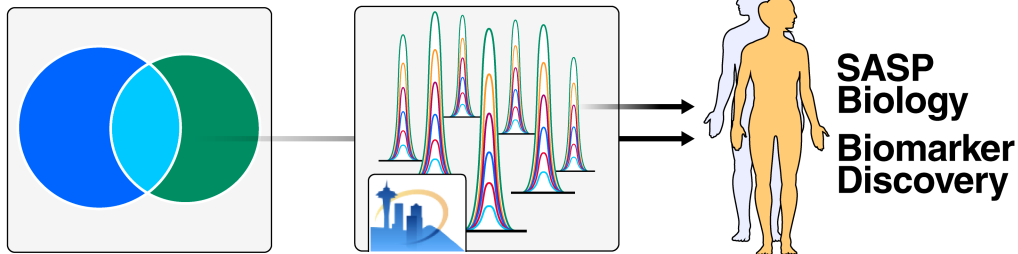

**A**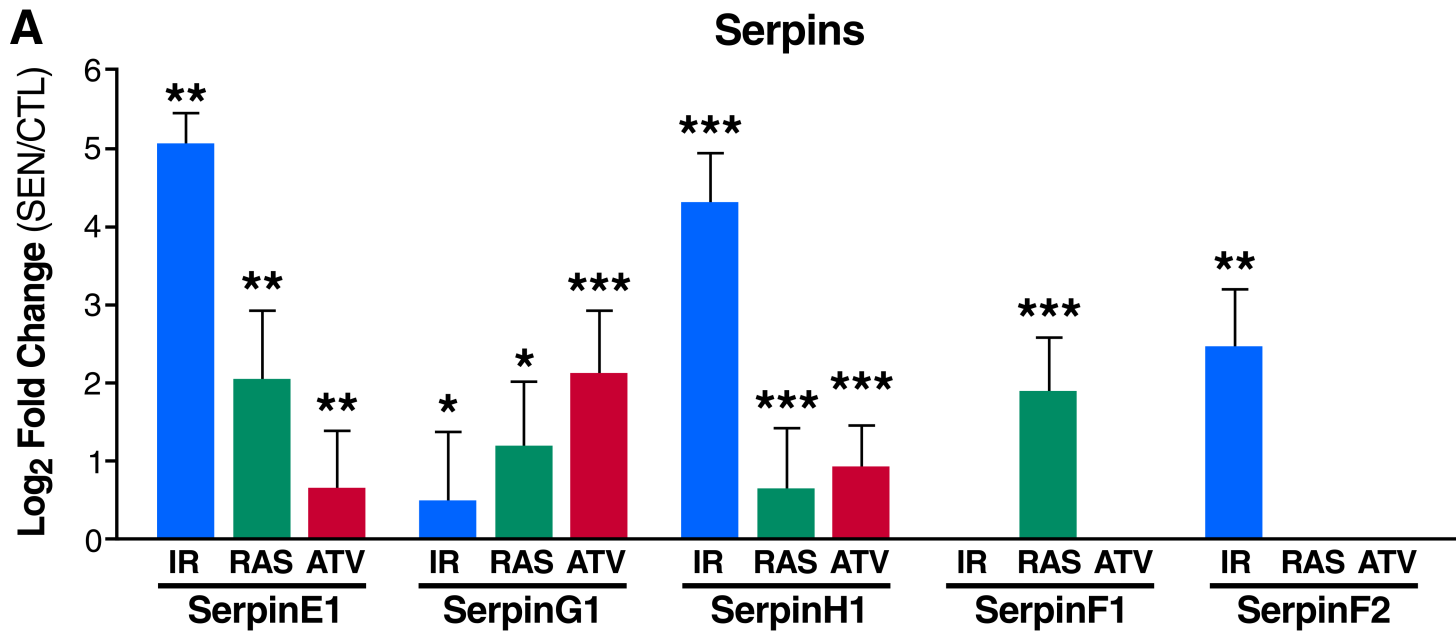**B**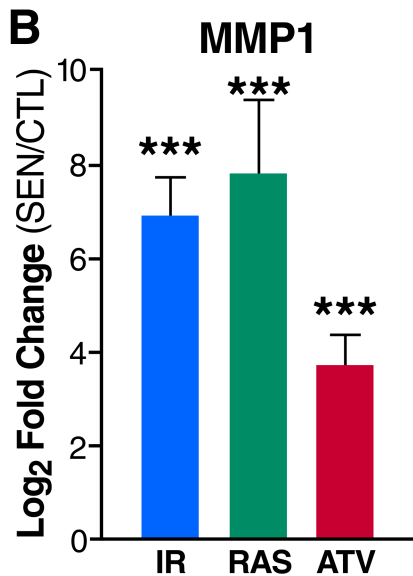**C**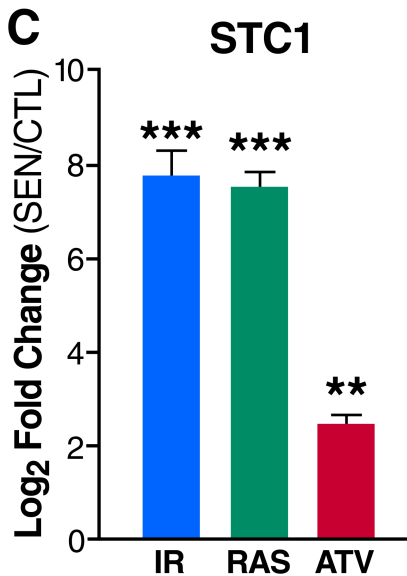**D**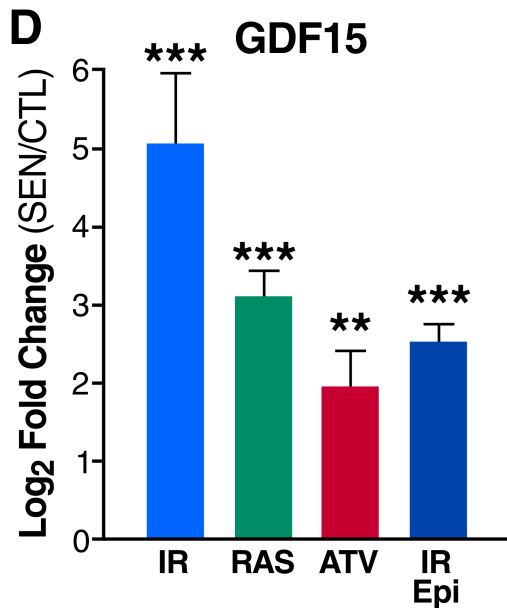

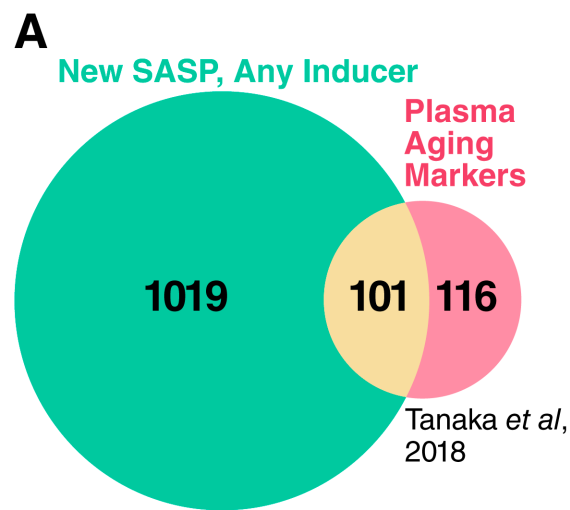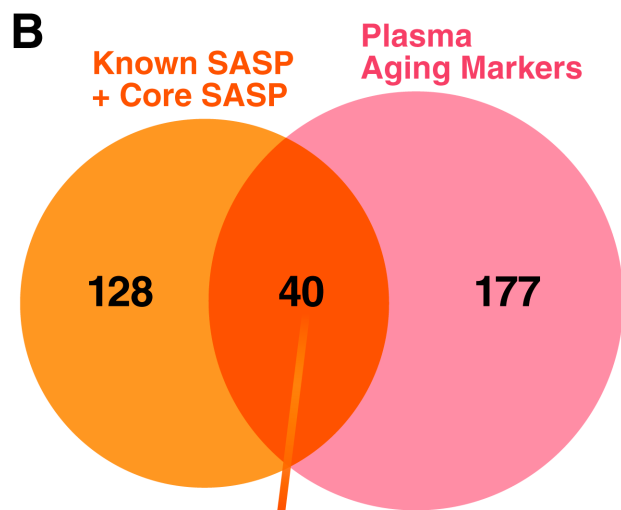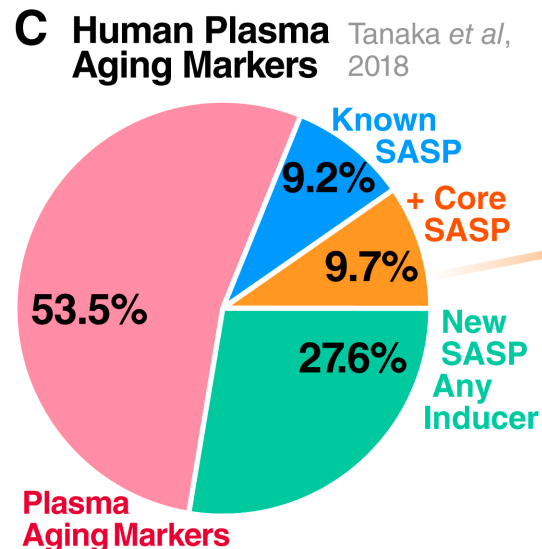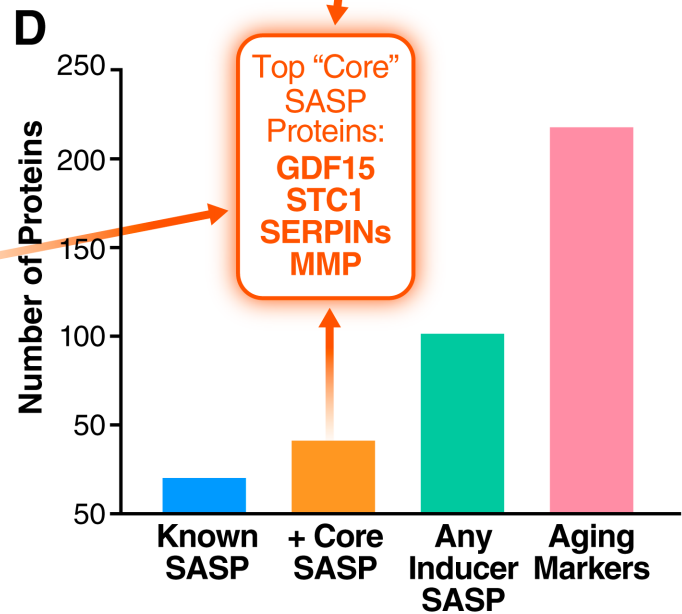

**A**

| Genes         | IR Log2<br>SEN/CTL | RAS Log2<br>SEN/CTL |
|---------------|--------------------|---------------------|
| <b>ANXA1</b>  | 1.43               | 6.19                |
| <b>ANXA2</b>  | 1.82               | 2.91                |
| <b>ENO3</b>   | 1.52               | 1.13                |
| <b>AHNAK</b>  | 1.21               | 4.92                |
| <b>SLC1A5</b> | 3.71               | 6.11                |
| <b>ITGA1</b>  | -1.52              | -1.77               |
| <b>COL6A2</b> | -5.56              | -2.32               |
| <b>COL6A1</b> | -5.71              | -3.26               |
| <b>COL6A3</b> | -5.65              | -6.87               |

**B**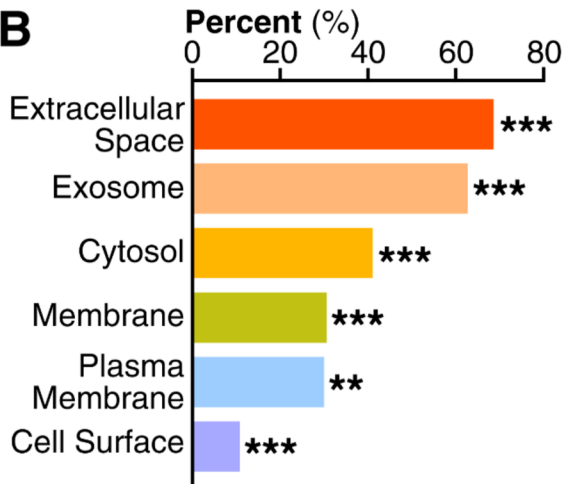**C**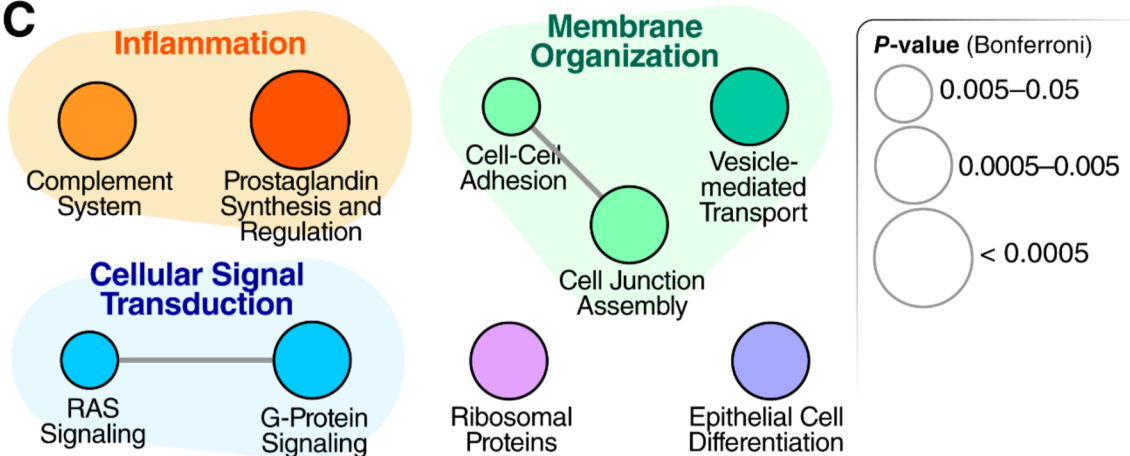

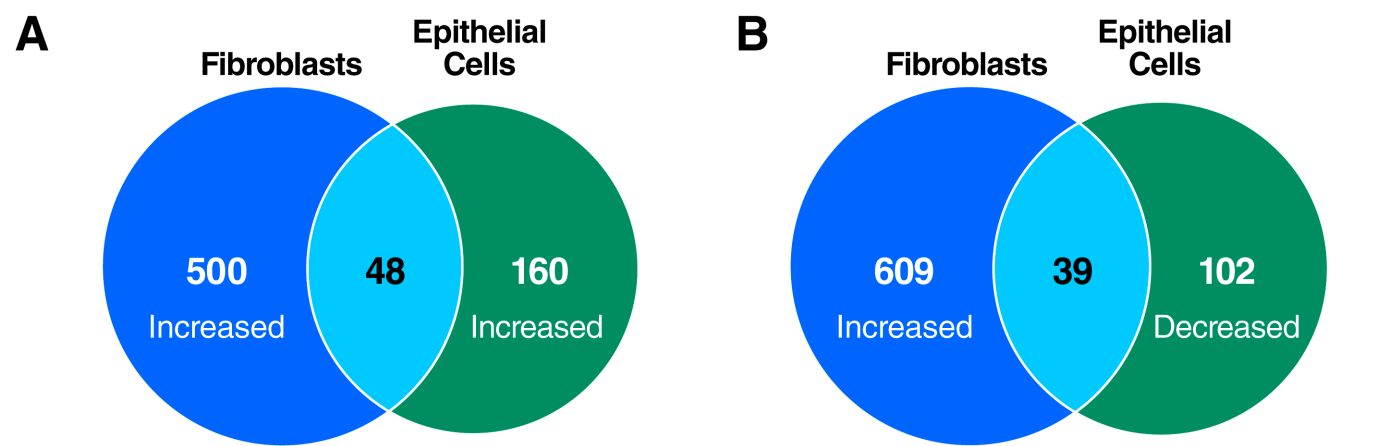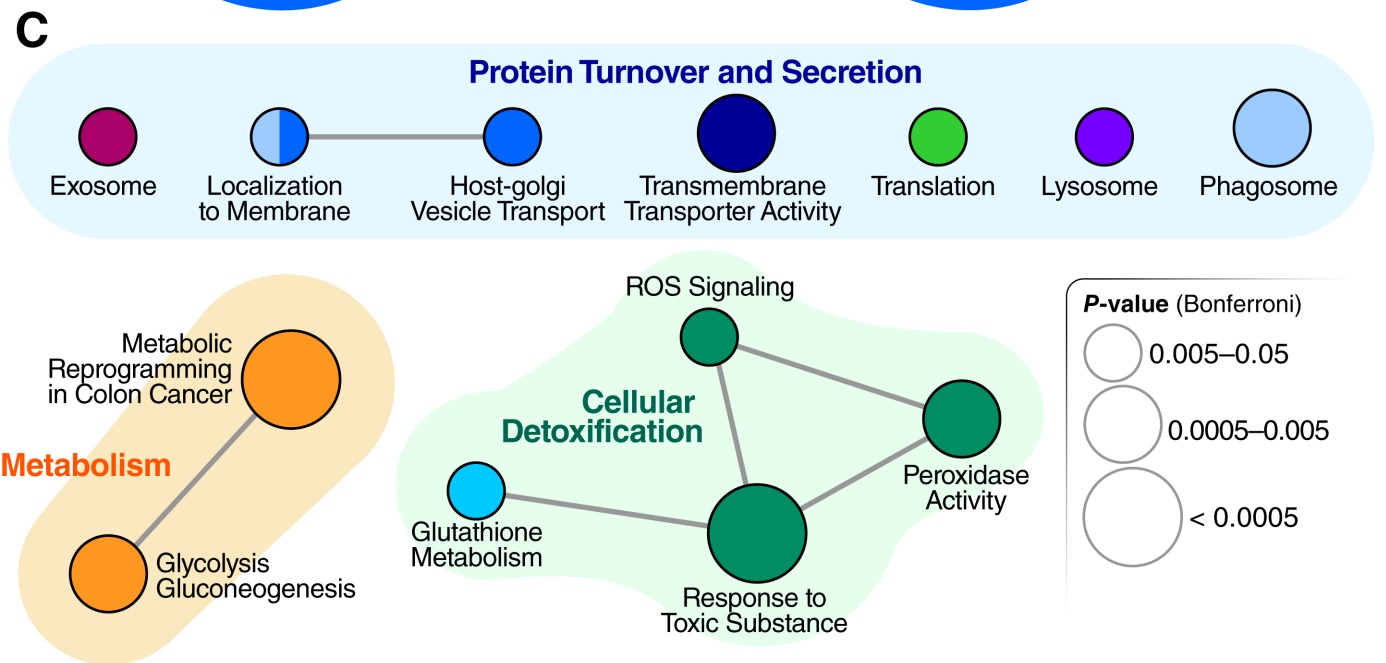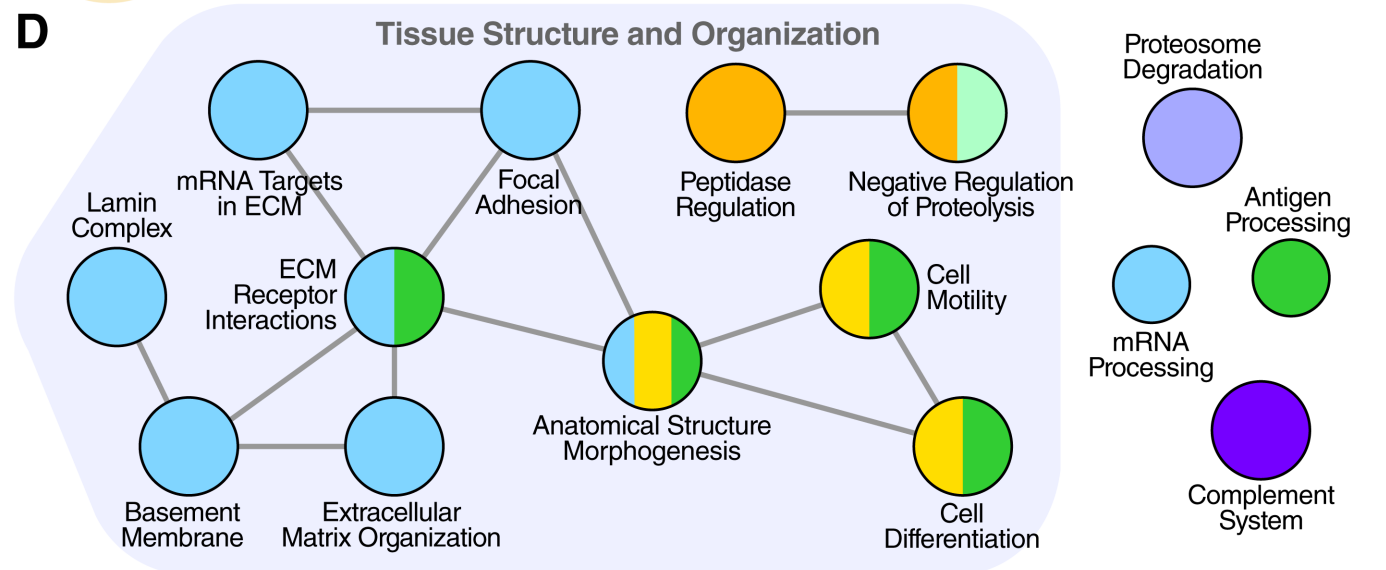





Click here to access/download  
**Supporting Information**  
Table S1.xlsx





Click here to access/download  
**Supporting Information**  
Table S2.xlsx





Click here to access/download  
**Supporting Information**  
Table S3.xlsx





Click here to access/download  
**Supporting Information**  
Table S4.xlsx





Click here to access/download  
**Supporting Information**  
Table S5.docx



Source: https://www.biorxiv.org/content/10.1101/604306v3.full.pdf
