# Supplementary material for: A Proteomic Atlas of Senescence-Associated Secretomes for Aging Biomarker Development
Source: bioRxiv or medRxiv preprint supplement (doi:10.1101/604306), 2019-08-21
Supplement: Supplementary file [file media-6.pdf]

## Supplementary Figure 2: Cell viability assays

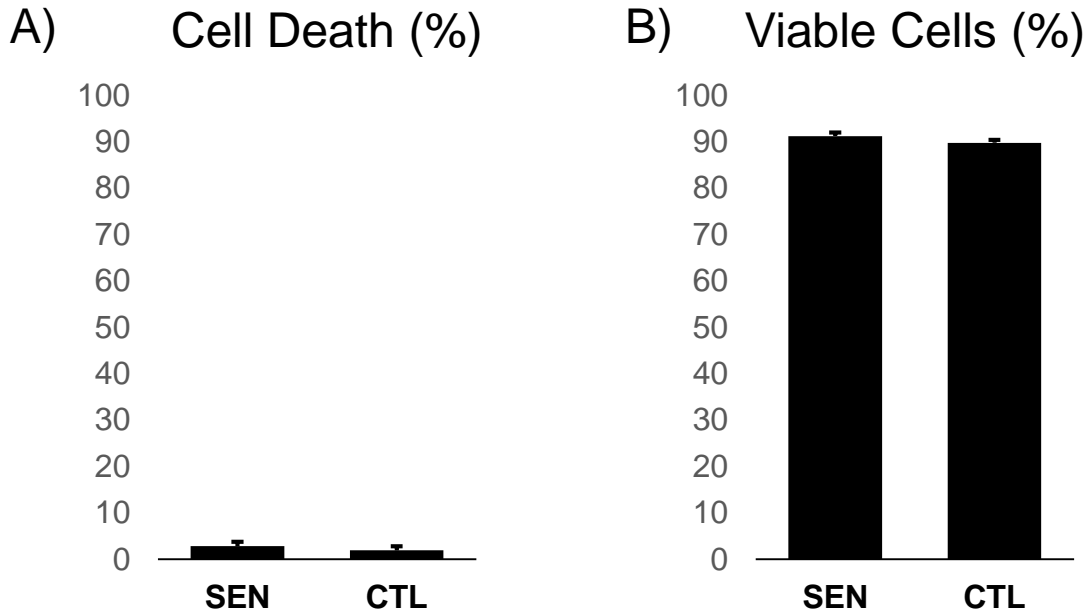

**Supplementary Figure 2: Cell viability assays.** A) Amount of cell death over a 24 hour period as indicated by Sytox Green viability dye assay. B) Fraction of viable cells measured by propidium iodide fluorescence intensity coupled with flow cytometry analysis.
