# Supplementary material for: A Proteomic Atlas of Senescence-Associated Secretomes for Aging Biomarker Development
Source: bioRxiv or medRxiv preprint supplement (doi:10.1101/604306), 2019-08-21

## A Number of unique peptides

|       | Exosome/EV Fraction |     | Soluble Fraction |     |
|-------|---------------------|-----|------------------|-----|
|       | IR                  | RAS | IR               | RAS |
| CD63  | 6                   | 6   | 0                | 0   |
| CD9   | 7                   | 7   | 0                | 0   |
| CD81  | 5                   | 5   | 0                | 0   |
| CDC42 | 20                  | 20  | 0                | 0   |

**Supplementary Figure 3: Exosome/EV proteomic markers and size distribution analysis.** A) Table of exosome and EV-specific markers identified in exosome and soluble fractions of fibroblasts by mass spectrometry. Multiple peptides from defining exosome/EV markers were identified in the exosome fractions of RAS and IR-induced senescence experiments but none were detected in the soluble fractions. IR = x-ray irradiation, RAS = RAS oncogene overexpression.

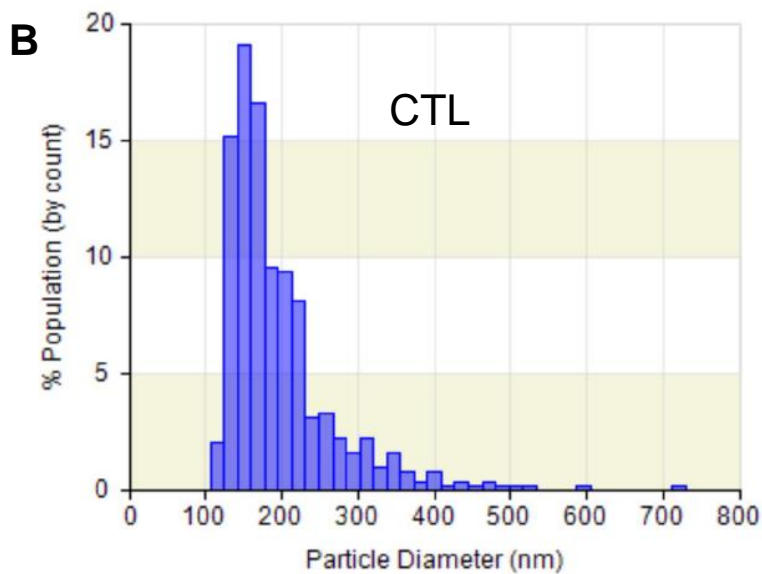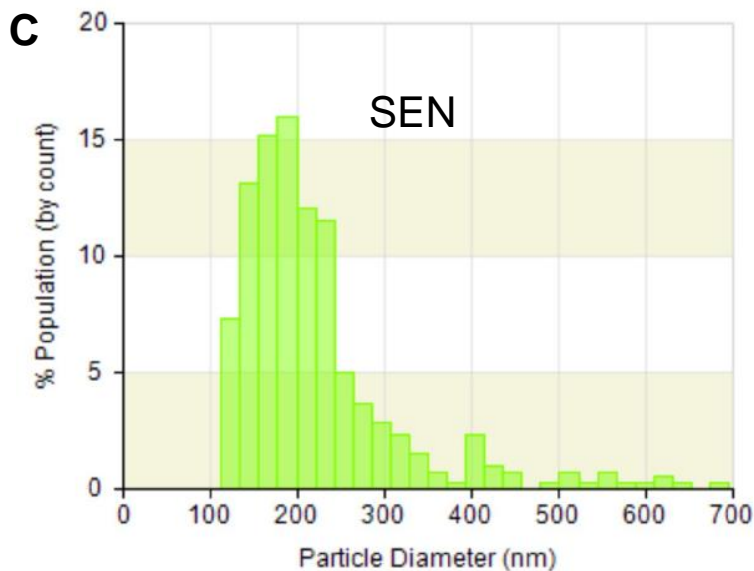

Supplement: Supplementary file [file media-7.pdf]
